# Supplementary material for: Highland barley β-glucan supplementation attenuated hepatic lipid accumulation in Western diet-induced non-alcoholic fatty liver disease mice by modulating gut microbiota
Source: Royal Society of Chemistry journal article supplement (doi:10.1039/d3fo03386d), 2023-12-20
Supplement: d3fo03386d1.xlsx [file d3fo03386d1.xlsx]

## Sheet: SCFAs
Acetic acid	peak area
ND1	46896.8
ND2	60340.9
ND3	49574
ND4	74682.4
ND5	97924
ND6	80048.3
WD1	38078.1
WD2	15003
WD3	22121.5
WD4	20559.8
WD5	34000.5
WD6	34904.7
HBG1	118256
HBG2	132301
HBG3	99412.6
HBG4	95883.6
HBG5	97203.8
HBG6	77231.9
Propionic acid	peak area
ND1	23594.2
ND2	31008.9
ND3	22768.5
ND4	43946.7
ND5	17756.7
ND6	36042.1
ND7	40133.9
WD1	9094.2
WD2	16029.6
WD3	9471.4
WD4	13942.3
WD5	10153.4
WD6	18993.6
WD7	17380.3
HBG1	35086.9
HBG2	26288.1
HBG3	35378.7
HBG4	53043.6
HBG5	45818.7
HBG6	36612.7
HBG7	30718.6
Butyric acid	peak area
ND1	29399.6
ND2	38580.3
ND3	35309
ND4	53186.7
ND5	61871.2
ND6	33325.4
WD1	14743.2
WD2	12355.4
WD3	3517.2
WD4	6769
WD5	14437.5
WD6	7139.2
HBG1	22426.8
HBG2	44201.5
HBG3	34784
HBG4	34234.9
HBG5	38425.5
HBG6	41594.8

## Sheet: FMT SCFAs
Acetic acid	peak area
FN1	82009.5
FN2	109307
FN3	107804
FN4	108008
FN5	83563.4
FW1	97111.4
FW2	113323
FW3	100534
FW4	94078
FW5	87213.2
FBG1	74872.8
FBG2	151130
FBG3	79694.4
FBG4	83367.1
FBG5	95916.6
Propionic acid	peak area
FN1	19755.2
FN2	34923.4
FN3	18217.7
FN4	38970.7
FN5	27183.3
FW1	13547.6
FW2	16067.9
FW3	19960.4
FW4	15914
FW5	17163.1
FBG1	26121.7
FBG2	30666.1
FBG3	25436.8
FBG4	21086.2
FBG5	26800.4
Butyric acid	peak area
FN65	59865.7
FN67	40674.2
FN86	49091.6
FN87	138848
FN88	89206.2
FW74	17639.7
FW76	10822.6
FW77	39945.5
FW78	35621.5
FW92	31932
FBG71	74022.1
FBG70	71681.7
FBG72	97978.3
FBG80	30198.7
FBG81	56419.6

## Sheet: PCR
		ND1	ND2	ND3	ND4	ND5	ND6	WD1	WD2	WD3	WD4	WD5	WD6	HBG1	HBG2	HBG3	HBG4	HBG5	HBG6
Ffar2	1	28.6265	27.1024	27.8193	28.5746	26.8413	28.1234	28.8566	29.8894	29.8494	29.4497	29.086	32.1615	26.9662	26.3849	29.0894	26.1283	26.9895	30.0898
	2	28.7243	27.2124	27.696	28.6938	26.9127	28.1334	29.1642	29.8489	29.8494	29.5483	29.0068	33.268	26	26.8493	29.385	26.2909	26.8944	30.0894
	3	29.0496	27.6817	27.7645	28.7172	26.8953	28.1893	28.9466	29.9895	29.8939	29.4671	29.1204	33.3561	27.4745	26.7837	29.1894	26.1393	26.9329	30.9849
β-actin	1	16.6022	15.4444	16.0258	16.4823	15.7363	16.704	16.5459	16.6021	16.3105	16.1508	15.917	19.9089	16.4417	16.2294	19.2117	15.3961	16.9457	19.9414
	2	16.6853	15.5966	16.0278	16.5892	15.6427	16.7606	16.3664	16.5292	16.5241	16.102	15.6392	20.2021	16.7845	16.2267	19.3043	15.2427	16.9807	19.9047
	3	16.5751	15.5877	16.1024	16.9023	15.459	16.9573	15.9962	16.7719	16.2934	15.91	15.3477	19.9937	16.5332	16.0989	18.8417	15.286	16.9889	19.9197
		ND1	ND2	ND3	ND4	ND5	ND6	WD1	WD2	WD3	WD4	WD5	WD6	HBG1	HBG2	HBG3	HBG4	HBG5	HBG6
Ffar3	1	31.048	29.1535	30.1609	30.607	29.439	30.1712	31.9839	31.7732	30.8938	30.9894	30.9894	30.9839	28.6038	28.6849	31.0366	28.084	29.6893	32.5891
	2	30.9956	29.4131	30.1324	30.5358	29.3046	30.2688	31.8824	31.9015	30.9895	30.8938	30.8949	30.8938	28.7883	28.7372	31.3304	28.0389	29.2839	32.2785
	3	30.7146	29.8068	30.2245	31.1326	29.415	30.1978	31.9898	31.9763	30.9898	30.9083	30.9849	30.9839	28.9188	28.7589	30.8941	28.1894	29.2389	32.8997

## Sheet: supplementary data
Serum TC
	FN	FW	FBG		Control	Standard
1	4.89672	6.29282	4.03233		0.0496	0.2181
2	4.46601	4.58186	4.04124		0.0497	0.2293
3	4.62047	5.56506	4.27888
4	3.83785	4.82543	4.43161
5	3.71098	4.61156	4.13473
Serum TG	FN	FW	FBG		Control	Standard
1	1.04053	1.16834	1.10369		0.0575	0.2107
2	1.07662	1.30367	0.756341		0.0599	0.2073
3	1.59689	1.34878	0.851071
4	1.69011	1.61343	0.83002
5	0.53831	1.36683	0.472149
Hepatic TC	FN	FW	FBG		Control	Standard
1	7.42171	9.42991	6.34449		0.048	0.226
2	8.29018	8.14505	6.35849		0.046	0.201
3	5.07148	11.2859	8.46518
4	7.06896	12.0821	7.01432
5	5.80594	10.7106	8.27698
Hepatic TG	FN	FW	FBG		Control	Standard
	5.7933	10.626	10.1027		0.062	0.301
	3.96979	14.0552	6.87036		0.054	0.244
	4.25306	10.8757	6.92361		0.054	0.281
	5.01793	15.2851	8.59662
	2.96151	14.1604	8.91648
Hepatic AST	FN	FW	FBG
	6.63746	25.4944	17.1042
	19.2415	24.9483	18.1593
	18.4448	23.518	17.6112
	12.7065	25.8796	20.567
	17.6502	24.7591	18.3148
Hepatic ALT	FN	FW	FBG
	28.6585	36.8613	28.9401
	18.9915	36.6171	25.798
	27.94	38.7489	26.9371
	25.7344	40.5364	29.5668
	21.1857	37.0273	27.8173
Final body weight（g）	FN	FW	FBG
	24.14	32.52	26.58
	26.3	26.96	23.58
	25.48	30.18	27.25
	28.15	28.12	26.7
	23.95	30.23	26.36
	28.91	31.6	22.82
Body weight gain （g）	FN	FW	FBG
	5.13	10.7	5.74
	4.55	6.29	4.5
	4.48	6.79	6.51
	6.26	6.56	6.97
	5.45	8.74	6.32
	5.94	7.28	3.88

## Sheet: 16S 
PCA Coordinate
group	axis1	axis2	axis3
HBG1	-0.00700139	-0.0165481	0.00975073
HBG3	-0.00736051	-0.00432773	-0.00576992
HBG4	-0.00739049	0.0019292	-0.00743381
HBG5	-0.00476042	-0.00301921	0.00392504
HBG6	-0.00788841	-0.0179337	0.00903
ND1	0.0179376	-0.00218521	-0.00653398
ND2	0.00914092	-0.00524897	-0.0106419
ND3	0.0145335	0.0109159	0.0245976
ND4	0.0145862	-0.00281083	-0.00703569
ND5	0.0131011	-0.00228333	-0.00577783
WD1	-0.00864379	0.0137597	-0.00708784
WD2	-0.00448126	0.0182224	0.0121632
WD3	-0.00666124	0.0047121	-0.000795875
WD4	-0.00878236	0.0111604	-0.0126076
WD5	-0.00632952	-0.00634272	0.00421784
PCoA Coordinate
sample	group	PC1	PC2	PC3	PC4	PC5	PC6	PC7	PC8	PC9	PC10	PC11	PC12	PC13	PC14	PC15
HBG1	HBG	-0.0641	0.035	0.0198	-0.0024	0.044	-0.0304	0.0046	-0.0062	0.0053	-0.0129	0.0109	-0.0181	0.0016	0.0003	0
HBG2	HBG	-0.0408	0.0018	-0.0363	-0.0156	0.0069	0.0245	0.0088	-0.0113	-0.0208	-0.0013	-0.0293	-0.0078	-0.0092	0.0001	0
HBG3	HBG	-0.0367	0.0217	-0.0346	-0.0373	-0.0346	-0.0191	0.0423	0.0032	-0.0213	0.0045	0.0175	0.0055	0.0021	-0.0003	0
HBG4	HBG	-0.0689	0.0455	-0.0151	0.0263	-0.0373	-0.0083	-0.0055	0.0208	0.0378	0.0055	-0.0114	0.0043	0.0002	0.0008	0
HBG5	HBG	-0.0581	0.045	-0.0006	-0.01	0.0111	0.0498	-0.036	-0.0079	-0.0086	-0.0094	0.0106	0.0076	0.0056	-0.0005	0
WD1	WD	-0.0452	-0.0225	0.0759	-0.0199	0.0156	-0.0114	0.0075	-0.0075	-0.0123	0.0145	-0.012	0.0123	0.001	0.0006	0
WD2	WD	0.0189	-0.0427	0.0125	-0.0608	-0.0034	0.0221	-0.0042	0.0131	0.0339	0.008	0.0127	-0.0047	-0.0074	-0.0002	0
WD3	WD	-0.0025	-0.0656	0.0053	0.0322	-0.0238	0.0186	0.0236	-0.03	0.0106	-0.0285	0.0045	0.0013	0.0023	0.0005	0
WD4	WD	0.001	-0.0423	0.0108	0.0008	-0.0534	-0.02	-0.0407	0.0101	-0.0225	0.0024	-0.0031	-0.0111	0.0045	-0.0002	0
WD5	WD	-0.0507	-0.0648	-0.0357	0.0448	0.0446	-0.0106	-0.0021	0.0214	0.0004	0.0115	0.0045	0.0052	-0.0002	-0.0008	0
ND1	ND	0.061	0.0113	-0.0316	-0.0058	0.0074	-0.032	-0.025	-0.0532	0.0111	0.0112	0.0017	0.0056	-0.0021	0	0
ND2	ND	0.0638	0.0263	0.016	0.0256	-0.0003	-0.0095	-0.0105	0.0231	-0.0191	-0.0174	0.0113	0.0067	-0.0129	0.0004	0
ND3	ND	0.0978	-0.0062	-0.027	-0.0323	0.0291	-0.0022	0.0016	0.0262	0.0005	-0.0124	-0.0121	0.0026	0.0101	0.0007	0
ND4	ND	0.0557	0.036	0.0315	0.0139	-0.0064	-0.0054	0.0183	0.001	0.0133	-0.0067	-0.0145	-0.0006	0.0016	-0.0019	0
ND5	ND	0.0687	0.0216	0.0092	0.0404	0.0002	0.0341	0.0171	-0.0029	-0.0081	0.0311	0.0088	-0.0088	0.0028	0.0005	0
Abundance heatmap Phylum
Taxon	ND42	ND41	ND15	ND13	ND11	WD1	WD2	WD3	WD6	WD8	HBG1	HBG3	HBG4	HBG6	HBG8	Taxon	ND42	ND41	ND15	ND13	ND11	WD1	WD2	WD3	WD6	WD8	HBG1	HBG3	HBG4	HBG6	HBG8	Taxon	ND42	ND41	ND15	ND13	ND11	WD1	WD2	WD3	WD6	WD8	HBG1	HBG3	HBG4	HBG6	HBG8	Taxon	ND42
Actinobacteria	0.0138798	0.00732779	0.049671	0.00226757	0.00674057	0.0217414	0.0720769	0.0217633	0.0109634	0.00492562	0.0039279	0.00568272	0.0389398	0.00436525	0.000962057	Actinobacteria	0.0138798	0.00732779	0.049671	0.00226757	0.00674057	0.0217414	0.0720769	0.0217633	0.0109634	0.00492562	0.0039279	0.00568272	0.0389398	0.00436525	0.000962057	Actinobacteria	0.0138798	0.00732779	0.049671	0.00226757	0.00674057	0.0217414	0.0720769	0.0217633	0.0109634	0.00492562	0.0039279	0.00568272	0.0389398	0.00436525	0.000962057	Actinobacteria	0.0138798
Bacteroidetes	0.527539	0.49569	0.500705	0.400862	0.634374	0.189577	0.123437	0.103688	0.141883	0.222906	0.346581	0.221152	0.127503	0.203089	0.410244	Bacteroidetes	0.527539	0.49569	0.500705	0.400862	0.634374	0.189577	0.123437	0.103688	0.141883	0.222906	0.346581	0.221152	0.127503	0.203089	0.410244	Bacteroidetes	0.527539	0.49569	0.500705	0.400862	0.634374	0.189577	0.123437	0.103688	0.141883	0.222906	0.346581	0.221152	0.127503	0.203089	0.410244	Bacteroidetes	0.527539
Cyanobacteria	0.000242973	0.000121623	8.81213e-05	0.000160821	7.17082e-05	0.000531251	0.00930953	0.000474885	0.000177269	7.11794e-05	4.20846e-05	7.17515e-05	0.000342502	0	4.37299e-05	Cyanobacteria	0.000242973	0.000121623	8.81213e-05	0.000160821	7.17082e-05	0.000531251	0.00930953	0.000474885	0.000177269	7.11794e-05	4.20846e-05	7.17515e-05	0.000342502	0	4.37299e-05	Cyanobacteria	0.000242973	0.000121623	8.81213e-05	0.000160821	7.17082e-05	0.000531251	0.00930953	0.000474885	0.000177269	7.11794e-05	4.20846e-05	7.17515e-05	0.000342502	0	4.37299e-05	Cyanobacteria	0.000242973
Deferribacteres	0.000349273	0.000957782	8.81213e-05	0.00517843	0.000243808	0.00187266	0.000383898	0.000990475	0.00114543	0.00175101	0.00628463	0.00109062	0.000579619	0.00346828	0.00185123	Deferribacteres	0.000349273	0.000957782	8.81213e-05	0.00517843	0.000243808	0.00187266	0.000383898	0.000990475	0.00114543	0.00175101	0.00628463	0.00109062	0.000579619	0.00346828	0.00185123	Deferribacteres	0.000349273	0.000957782	8.81213e-05	0.00517843	0.000243808	0.00187266	0.000383898	0.000990475	0.00114543	0.00175101	0.00628463	0.00109062	0.000579619	0.00346828	0.00185123	Deferribacteres	0.000349273
Deinococcus-Thermus	9.11148e-05	0.00010642	7.34344e-05	0.000257313	5.73666e-05	0	0	2.71363e-05	0.000190905	4.27077e-05	0	5.74012e-05	9.2212e-05	0.000313939	0	Deinococcus-Thermus	9.11148e-05	0.00010642	7.34344e-05	0.000257313	5.73666e-05	0	0	2.71363e-05	0.000190905	4.27077e-05	0	5.74012e-05	9.2212e-05	0.000313939	0	Deinococcus-Thermus	9.11148e-05	0.00010642	7.34344e-05	0.000257313	5.73666e-05	0	0	2.71363e-05	0.000190905	4.27077e-05	0	5.74012e-05	9.2212e-05	0.000313939	0	Deinococcus-Thermus	9.11148e-05
Epsilonbacteraeota	0.0159451	0.0159022	0.00796029	0.0674161	0.0277224	0.0087922	0.00830865	0.00719112	0.0105679	0.0131824	0.0630287	0.00545311	0.00837812	0.0222	0.00193869	Epsilonbacteraeota	0.0159451	0.0159022	0.00796029	0.0674161	0.0277224	0.0087922	0.00830865	0.00719112	0.0105679	0.0131824	0.0630287	0.00545311	0.00837812	0.0222	0.00193869	Epsilonbacteraeota	0.0159451	0.0159022	0.00796029	0.0674161	0.0277224	0.0087922	0.00830865	0.00719112	0.0105679	0.0131824	0.0630287	0.00545311	0.00837812	0.0222	0.00193869	Epsilonbacteraeota	0.0159451
Firmicutes	0.40704	0.40654	0.426213	0.448931	0.31903	0.750219	0.760681	0.815772	0.782273	0.740152	0.548488	0.722709	0.797002	0.680918	0.547848	Firmicutes	0.40704	0.40654	0.426213	0.448931	0.31903	0.750219	0.760681	0.815772	0.782273	0.740152	0.548488	0.722709	0.797002	0.680918	0.547848	Firmicutes	0.40704	0.40654	0.426213	0.448931	0.31903	0.750219	0.760681	0.815772	0.782273	0.740152	0.548488	0.722709	0.797002	0.680918	0.547848	Firmicutes	0.40704
Fusobacteria	0.000318902	0.000395275	0.000352485	0.000434216	0.000372883	0.000305469	0.000342766	0.000189954	0.000245449	0.000498256	0.00015431	0.000200904	7.90389e-05	0.000313939	0.000233226	Fusobacteria	0.000318902	0.000395275	0.000352485	0.000434216	0.000372883	0.000305469	0.000342766	0.000189954	0.000245449	0.000498256	0.00015431	0.000200904	7.90389e-05	0.000313939	0.000233226	Fusobacteria	0.000318902	0.000395275	0.000352485	0.000434216	0.000372883	0.000305469	0.000342766	0.000189954	0.000245449	0.000498256	0.00015431	0.000200904	7.90389e-05	0.000313939	0.000233226	Fusobacteria	0.000318902
Patescibacteria	0.00287012	0.00381592	0.00195335	0.00202634	0.000114733	9.29689e-05	6.85533e-05	4.07045e-05	0.000136361	2.84718e-05	4.20846e-05	4.30509e-05	3.95194e-05	0.00026909	5.83065e-05	Patescibacteria	0.00287012	0.00381592	0.00195335	0.00202634	0.000114733	9.29689e-05	6.85533e-05	4.07045e-05	0.000136361	2.84718e-05	4.20846e-05	4.30509e-05	3.95194e-05	0.00026909	5.83065e-05	Patescibacteria	0.00287012	0.00381592	0.00195335	0.00202634	0.000114733	9.29689e-05	6.85533e-05	4.07045e-05	0.000136361	2.84718e-05	4.20846e-05	4.30509e-05	3.95194e-05	0.00026909	5.83065e-05	Patescibacteria	0.00287012
Proteobacteria	0.0133179	0.0626815	0.0117201	0.0633634	0.00942246	0.0194438	0.0196748	0.0486825	0.0307766	0.0150189	0.0231746	0.0416302	0.0239356	0.0251151	0.0342259	Proteobacteria	0.0133179	0.0626815	0.0117201	0.0633634	0.00942246	0.0194438	0.0196748	0.0486825	0.0307766	0.0150189	0.0231746	0.0416302	0.0239356	0.0251151	0.0342259	Proteobacteria	0.0133179	0.0626815	0.0117201	0.0633634	0.00942246	0.0194438	0.0196748	0.0486825	0.0307766	0.0150189	0.0231746	0.0416302	0.0239356	0.0251151	0.0342259	Proteobacteria	0.0133179
Spirochaetes	0.000167044	6.08115e-05	0.000102808	0.000209067	8.60499e-05	0.000159375	0.00020566	0.000284931	0.000109088	4.27077e-05	0.000196395	0.000129153	0.000131731	0.000164444	0.00013119	Spirochaetes	0.000167044	6.08115e-05	0.000102808	0.000209067	8.60499e-05	0.000159375	0.00020566	0.000284931	0.000109088	4.27077e-05	0.000196395	0.000129153	0.000131731	0.000164444	0.00013119	Spirochaetes	0.000167044	6.08115e-05	0.000102808	0.000209067	8.60499e-05	0.000159375	0.00020566	0.000284931	0.000109088	4.27077e-05	0.000196395	0.000129153	0.000131731	0.000164444	0.00013119	Spirochaetes	0.000167044
Tenericutes	0.0178129	0.00551865	0.000279051	0.00791238	0.00100392	0.000119531	0.00359219	0.000108545	0.000149997	4.27077e-05	0.00764537	0.000731865	0.00172568	0.000254141	0.00142851	Tenericutes	0.0178129	0.00551865	0.000279051	0.00791238	0.00100392	0.000119531	0.00359219	0.000108545	0.000149997	4.27077e-05	0.00764537	0.000731865	0.00172568	0.000254141	0.00142851	Tenericutes	0.0178129	0.00551865	0.000279051	0.00791238	0.00100392	0.000119531	0.00359219	0.000108545	0.000149997	4.27077e-05	0.00764537	0.000731865	0.00172568	0.000254141	0.00142851	Tenericutes	0.0178129
Verrucomicrobia	0.000425202	0.000881767	0.000793091	0.000981007	0.000760107	0.00714532	0.00191949	0.000786953	0.0213813	0.00133817	0.000434874	0.00104757	0.00125145	0.0595288	0.00103494	Verrucomicrobia	0.000425202	0.000881767	0.000793091	0.000981007	0.000760107	0.00714532	0.00191949	0.000786953	0.0213813	0.00133817	0.000434874	0.00104757	0.00125145	0.0595288	0.00103494	Verrucomicrobia	0.000425202	0.000881767	0.000793091	0.000981007	0.000760107	0.00714532	0.00191949	0.000786953	0.0213813	0.00133817	0.000434874	0.00104757	0.00125145	0.0595288	0.00103494	Verrucomicrobia	0.000425202
Abundance heatmap genus
Taxon	ND1	ND2	ND3	ND4	ND5	WD1	WD2	WD3	WD4	WD5	HBG1	HBG2	HBG3	HBG4	HBG5
Acetatifactor	0.000121486	0.00021284	4.40606e-05	0.000337724	2.86833e-05	0.00010625	0.000123396	0.00036634	6.81803e-05	0.000740266	0.000112226	0.0294611	0.000316156	0.000254141	0.00099121
Akkermansia	0.000425202	0.000881767	0.000793091	0.000981007	0.000760107	0.00714532	0.00191949	0.000786953	0.0213813	0.00133817	0.000434874	0.00104757	0.00125145	0.0595288	0.00103494
Alloprevotella	0.00273344	0.000653724	0.00365703	0.000884515	0.00598047	0.0133875	0.0158221	0.00611924	0.00516806	0.0316464	0.107666	0.0503695	0.00148857	0.00844645	0.159687
Anaerotruncus	0.00212601	0.00930416	0.00142463	0.00944018	0.00672623	0.00513985	0.00488099	0.0060921	0.00308175	0.00636344	0.00221646	0.0128866	0.00465012	0.00726544	0.00281329
Bacteroides	0.0190885	0.0165559	0.0514041	0.0128978	0.0328854	0.0477196	0.0234315	0.0227674	0.0190223	0.119083	0.187697	0.0720098	0.0601354	0.110058	0.175867
Bifidobacterium	0.00750178	0.0037095	0.00724063	0.000916679	0.00269623	0.00998752	0.0132993	0.0119807	0.0026863	0.00149477	0.000294592	0.000401808	0.00130414	0.000642827	0.000116613
Blautia	0.0048139	0.0068565	0.00505229	0.00734951	0.00354239	0.157742	0.0211144	0.0685327	0.171596	0.0734145	0.0187838	0.0654517	0.0275846	0.138313	0.04338
Coriobacteriaceae_UCG-002	0.00529984	0.00246287	0.0403889	0.000964925	0.0015489	0.00314766	0.0483986	0.00135682	0.00404991	0.00143782	0.000631269	0.00380283	0.0339604	0.00201818	0.000349839
Desulfovibrio	0.0113438	0.0554297	0.00820996	0.0531513	0.0060952	0.0132281	0.0135324	0.0440422	0.025704	0.00973735	0.0113628	0.034656	0.0187059	0.0151289	0.0265295
Dubosiella	0.000121486	0.000440884	0.000323111	0.000209067	0.000387224	0.00010625	0.0138066	0.000271363	0.000245449	0.000199302	0.000224451	0.000272656	0.000171251	0.000194343	0.000393569
Enterorhabdus	0.000820033	0.000881767	0.0017918	0.000289477	0.00183573	0.00703907	0.00844576	0.0069876	0.00320447	0.00163713	0.00238479	0.00116237	0.00180472	0.00143515	0.000262379
Erysipelatoclostridium	0.000227787	0.000121623	0.000528728	0.000402052	0.00215125	0.0270539	0.072735	0.0127676	0.0182041	0.0167556	0.0475275	0.00365932	0.0227764	0.00753453	0.0274186
Faecalibacterium	0.00159451	0.00196117	0.00186523	0.00162429	0.00177836	0.00131485	0.00237194	0.00124827	0.00113179	0.00234892	0.00281967	0.0023678	0.00245021	0.00304969	0.00255091
Faecalibaculum	0.0107971	0.01461	0.0320468	0.00431	0.0234916	0.107074	0.197941	0.0912458	0.0430899	0.0218948	0.00123448	0.00328622	0.062309	0.00766908	0.000670525
Family_XIII_AD3011_group	0.00533022	0.00498655	0.00992833	0.002155	0.0201357	0.000292188	0.000137107	0.00021709	0.000709075	7.11794e-05	0.000126254	0.000200904	0.000197597	0.00119596	7.28831e-05
GCA-900066575	0.00075929	0.0031774	0.000352485	0.00355414	0.000788791	0.00861954	0.00769167	0.0203794	0.00524988	0.0354474	0.0457459	0.0240941	0.0450126	0.0141272	0.0520385
Helicobacter	0.0159451	0.0159022	0.00796029	0.0674161	0.0277224	0.0087922	0.00830865	0.00719112	0.0105679	0.0131824	0.0630287	0.00545311	0.00837812	0.0222	0.00193869
Ileibacterium	0.0883965	0.0831902	0.305825	0.0211158	0.0727839	0.00300157	0.0617253	0.00245584	0.00194996	0.00247704	0.00112226	0.000846667	0.00115924	0.0280303	0.000845444
Intestinimonas	0.00785106	0.0205239	0.00180649	0.0326788	0.00633901	0.0270008	0.0512367	0.0631598	0.0465808	0.0374262	0.034804	0.0302791	0.0232243	0.0178198	0.0298967
Lachnospiraceae_NK4A136_group	0.0852834	0.0168448	0.00264364	0.0229974	0.0102973	0.00325391	0.00143962	0.0036634	0.00253631	0.0108762	0.0326576	0.0873215	0.166258	0.0232165	0.0137312
Lachnospiraceae_UCG-006	0.00109338	0.012588	0.00102808	0.0136537	0.00167797	0.00116875	0.00760941	0.00115329	0.00467717	0.00031319	0.000996002	0.0022243	0.0023053	0.00182384	0.00141393
Lactobacillus	0.041928	0.0129225	0.0231025	0.00387578	0.0329141	0.0107844	0.0285593	0.0159697	0.00488171	0.017439	0.0048257	0.002253	0.0058884	0.00198828	0.00144309
Mucispirillum	0.000349273	0.000957782	8.81213e-05	0.00517843	0.000243808	0.00187266	0.000383898	0.000990475	0.00114543	0.00175101	0.00628463	0.00109062	0.000579619	0.00346828	0.00185123
Oscillibacter	0.00824589	0.0111133	0.00101339	0.0230456	0.00562193	0.00856642	0.00449709	0.0137174	0.0113179	0.0409851	0.0140422	0.0292172	0.0174808	0.0137236	0.0150285
Parabacteroides	0.00324976	0.00407437	0.00456762	0.00390795	0.00159192	0.0337211	0.0138478	0.00682478	0.0154496	0.0356467	0.0089079	0.0177513	0.0158341	0.00536686	0.0268064
Rikenella	0.0312372	0.0488469	0.00879744	0.0297519	0.0215842	0.0129891	0.00423659	0.0138667	0.00589078	0.00465514	0.0125132	0.00508	0.00436031	0.00750463	0.0172004
Rikenellaceae_RC9_gut_group	0.000531503	0.000744941	0.000396546	0.000643283	0.000272491	0.00228438	0.000891192	0.00154677	0.000531806	0.00439889	0.0027355	0.00121977	0.000645484	0.000478383	0.00466452
Romboutsia	0.00356866	0.00218922	0.0012337	0.0015278	0.0148149	0.0470954	0.0560628	0.0116279	0.00819527	0.0277173	0.000224451	0.000330057	0.00175203	7.47474e-05	0.000320686
Roseburia	0.000273344	0.000699333	0.000352485	0.000578955	0.00096089	0.00110235	0.00120654	0.0021709	0.0010227	0.00626379	0.00847303	0.0161728	0.0303773	0.0282694	0.0198971
Ruminiclostridium	0.00839775	0.00503215	0.000822465	0.0103729	0.00754371	0.00143438	0.000726664	0.00409758	0.000954524	0.0422236	0.0198499	0.00334362	0.00192328	0.0963942	0.0180604
Ruminiclostridium_5	0.00130598	0.00912173	0.000293738	0.00582171	0.00134811	0.00332032	0.00113798	0.0110987	0.0041999	0.00358744	0.00586379	0.00413288	0.00167299	0.00481373	0.00459164
Ruminiclostridium_9	0.0105541	0.0167384	0.00148337	0.02861	0.00727121	0.0833267	0.033454	0.0899704	0.123147	0.0404869	0.0460967	0.123714	0.111972	0.0313789	0.0564553
Ruminococcaceae_UCG-009	0.00393312	0.00637001	0.000881213	0.00677056	0.00929339	0.00051797	0.00042503	2.71363e-05	0.000613622	2.84718e-05	1.40282e-05	0	2.63463e-05	4.48484e-05	0
Ruminococcaceae_UCG-010	0.00400905	0.00068413	0.00093996	0.000836268	0.000788791	0.000783595	0.000740375	0.000691976	0.00106361	0.000128123	0.00115031	0.00050226	0.00152809	0.00121091	0.000466452
Ruminococcaceae_UCG-013	0.000561875	0.000972984	0.0015715	0.000900597	0.000243808	0.0018461	0.00235823	0.000936203	0.00297266	0.000526728	0.000350705	0.000258305	0.000685004	0.000403636	0.000772561
Ruminococcaceae_UCG-014	0.0313283	0.0109309	0.00318705	0.00677056	0.00980969	0.0031875	0.00309861	0.00876503	0.0055226	0.00306072	0.0146034	0.00249695	0.020234	0.00162949	0.00686559
Streptococcus	0.00057706	0.00079055	0.000719657	0.000450298	0.00124772	0.00203203	0.00505923	0.00274077	0.000995432	0.000469784	0.000715438	0.000774916	0.00096164	0.000687676	0.000801714
Tyzzerella	0.00690954	0.000744941	0.00140994	0.00228366	0.000788791	0.000770314	0.00122025	0.00185884	0.00323174	0.0147057	0.00747703	0.00127718	0.00096164	0.0101507	0.00150139
[Acetivibrio]_ethanolgignens_group	0.00124524	0.0042416	0.00102808	0.00887731	0.000544983	3.98438e-05	2.74213e-05	1.35682e-05	2.72721e-05	0	0	0	0	0	2.91532e-05
[Eubacterium]_coprostanoligenes_group	0.000501131	0.000471289	0.00139525	0.000578955	0.000372883	0.00669376	0.0109274	0.0027272	0.0141406	0.00118158	0.00340885	0.00298486	0.00744283	0.000657777	0.00208446
[Eubacterium]_nodatum_group	0.0051328	0.00305578	0.00187992	0.00257313	0.0128931	0.00150078	0.00415433	0.00137038	0.00316356	0.00690441	0.0105632	0.00100452	0.00403098	0.00406626	0.00279871
uncultured_bacterium_f_Clostridiales_vadinBB60_group	0.0191493	0.00133785	0.000117495	0.00279828	0.00252413	0.00193907	0.000548426	0.0014925	0.000136361	0.000156595	1.40282e-05	5.74012e-05	3.95194e-05	1.49495e-05	7.28831e-05
uncultured_bacterium_f_Desulfovibrionaceae	0.00139709	0.00670447	0.00118964	0.00919895	0.00187876	0.000929689	0.000329056	0.00264579	0.00196359	0.00405723	0.00315634	0.00477865	0.00313521	0.00487353	0.00451875
uncultured_bacterium_f_Erysipelotrichaceae	0.000349273	1.52029e-05	0.000132182	8.04104e-05	0.0031695	0.0024836	0.00327685	0.00596999	0.00156815	0.00381522	0.00197798	0.000645763	2.63463e-05	0.000134545	0.000393569
uncultured_bacterium_f_Lachnospiraceae	0.0285037	0.0960822	0.00878275	0.149644	0.0312935	0.146253	0.0972634	0.278242	0.202891	0.22403	0.157901	0.201048	0.163426	0.145339	0.178053
uncultured_bacterium_f_Muribaculaceae	0.468026	0.422503	0.429635	0.351152	0.569994	0.0782001	0.0632472	0.0515183	0.0949478	0.0255534	0.0244932	0.0722107	0.0427996	0.0689021	0.0252467
uncultured_bacterium_f_Peptococcaceae	0.000728918	0.00186995	0.000690283	0.002155	0.00106128	0.0369485	0.0302868	0.00811376	0.0540806	0.0427646	0.0111945	0.0242663	0.019931	0.0456407	0.0130607
uncultured_bacterium_f_Ruminococcaceae	0.0142595	0.0342673	0.00766655	0.0539876	0.0174681	0.0339735	0.0169052	0.0601069	0.0266721	0.0370845	0.0350565	0.0305518	0.0310623	0.028987	0.0390653
uncultured_bacterium_o_Clostridiales	0.00057706	0.00199158	0.000117495	0.00427783	0.000473274	0.00300157	0.0010283	0.00289002	0.00208632	0.00664816	0.00303009	0.00370237	0.00439983	0.00131555	0.00164716
uncultured_bacterium_o_Mollicutes_RF39	0.00581616	0.00454566	0.000146869	0.00329683	0.000975232	0.000119531	0.00357848	8.14089e-05	0.000136361	4.27077e-05	0.00600407	7.17515e-05	0.00148857	8.96968e-05	0.000597642
Relabundance table
phylum	ND	WD	HBG
Firmicutes	0.400227	0.770021	0.661493
Bacteroidetes	0.514423	0.155896	0.259736
Proteobacteria	0.0313457	0.026809	0.0295082
Epsilonbacteraeota	0.0264245	0.00957287	0.0202255
Actinobacteria	0.0162503	0.0263959	0.0113231
Verrucomicrobia	0.000765928	0.00656066	0.0120666
Tenericutes	0.00638374	0.000801615	0.00238949
Deferribacteres	0.00129966	0.00122841	0.00263071
Cyanobacteria	0.000135696	0.00211211	0.000105001
Patescibacteria	0.00213193	7.3869e-05	8.7974e-05
Others	0.000612139	0.000528026	0.000434194
Relabundance table
genus	ND	WD	HBG
uncultured_bacterium_f_Muribaculaceae	0.45064	0.0630786	0.0464503
uncultured_bacterium_f_Lachnospiraceae	0.0611596	0.189403	0.169163
Bacteroides	0.0269613	0.0457988	0.120297
Ruminiclostridium_9	0.0126137	0.0744709	0.0748602
Blautia	0.00547608	0.0990638	0.0573874
Ileibacterium	0.116107	0.0142978	0.0061298
Faecalibaculum	0.0173691	0.0928068	0.0159091
Lachnospiraceae_NK4A136_group	0.027296	0.00429534	0.0667722
uncultured_bacterium_f_Ruminococcaceae	0.0249982	0.0349701	0.0329335
Intestinimonas	0.013461	0.0450601	0.027235
Alloprevotella	0.0028466	0.0142677	0.0647545
Desulfovibrio	0.0261803	0.0213345	0.0212188
uncultured_bacterium_f_Peptococcaceae	0.00128459	0.03436	0.0225639
Helicobacter	0.0264245	0.00957287	0.0202255
GCA-900066575	0.00168564	0.0152854	0.0365291
Others	0.185496	0.241935	0.217571
alpha_diversity
Sample ID	Feature	ACE	Chao1	Simpson	Shannon	PD_whole_tree	Coverage
HBG1	336	352.916	355.375	0.9569	5.6816	19.6055	0.9996
HBG2	342	367.651	389.526	0.9496	5.4405	20.1167	0.9994
HBG3	347	368.209	374.391	0.9622	5.7115	20.357	0.9995
HBG6	344	371.283	385.046	0.9669	5.7463	19.9582	0.9994
HBG8	344	382.749	381.121	0.9443	5.3671	19.8115	0.9993
ND1	368	384.364	394.105	0.9036	5.2675	21.4002	0.9995
ND2	339	357.253	357.03	0.88	4.6505	20.3854	0.9995
ND3	360	386.089	393.115	0.9143	5.0621	21.1028	0.9994
ND4	344	385.554	385.325	0.8641	4.1228	21.0168	0.9991
ND5	369	382.458	384.261	0.935	5.6999	21.3805	0.9996
WD1	348	367.967	374.25	0.9488	5.5168	20.1144	0.9995
WD2	357	370.767	372.12	0.9379	5.3681	20.796	0.9996
WD3	339	367.036	365	0.9678	5.8674	20.2692	0.9995
WD4	352	379.639	387.037	0.9392	5.3409	20.9042	0.9994
WD5	321	342.001	342.12	0.9758	6.0225	19.1388	0.9995
difference_analysis
Phylum.ANOVA
Phylum	HBG(Mean)	HBG(Sd)	WD(Mean)	WD(Sd)	ND(Mean)	ND(Sd)	multiGroup(p)	multiGroup(p-corrected)	HBG::WD(p)	HBG::ND(p)	WD::ND(p)
Actinobacteria	0.010776	0.015839	0.026294	0.026594	0.015977	0.019286	0.413412	0.488578
Bacteroidetes	0.261714	0.11441	0.156298	0.048989	0.511834	0.083609	6e-06	4.2e-05	>= 0.1	< 0.001	< 0.001
Cyanobacteria	0.0001	0.000138	0.002113	0.004028	0.000137	6.8e-05	0.384791	0.500228
Deferribacteres	0.002655	0.002304	0.001229	0.000605	0.001363	0.002158	0.319279	0.461181
Deinococcus-Thermus	9.3e-05	0.00013	5.2e-05	8e-05	0.000117	8.1e-05	0.674845	0.674845
Epsilonbacteraeota	0.0202	0.025145	0.009608	0.00234	0.026989	0.023674	0.171355	0.278452
Firmicutes	0.659393	0.109716	0.769819	0.03006	0.401551	0.04929	3e-06	4.2e-05	>= 0.1	< 0.001	< 0.001
Fusobacteria	0.000196	8.8e-05	0.000316	0.000117	0.000375	4.4e-05	0.000193	0.000626	>= 0.1	< 0.05	>= 0.1
Patescibacteria	9e-05	0.0001	7.3e-05	4.3e-05	0.002156	0.001368	7.1e-05	0.000307	>= 0.1	< 0.001	< 0.001
Proteobacteria	0.029616	0.008056	0.026719	0.013586	0.032101	0.028262	0.600065	0.65007
Spirochaetes	0.000151	3e-05	0.00016	9.2e-05	0.000125	6.1e-05	0.009713	0.025253	>= 0.1	>= 0.1	>= 0.1
Tenericutes	0.002357	0.003012	0.000803	0.00156	0.006505	0.007068	0.048133	0.08939
Verrucomicrobia	0.01266	0.026202	0.006514	0.008691	0.000768	0.00021	0.029578	0.064086
difference_analysis
genus.ANOVA
Genus	HBG(Mean)	HBG(Sd)	WD(Mean)	WD(Sd)	ND(Mean)	ND(Sd)	multiGroup(p)	multiGroup(p-corrected)	HBG::WD(p)	HBG::ND(p)	WD::ND(p)
A2	3e-06	6e-06	5e-06	1.2e-05	0.000312	0.00036	0.023875	0.062368
ASF356	0	0	5e-06	7e-06	0.000105	0.000211	0.335181	0.4423
Acetatifactor	0.006227	0.012993	0.000281	0.000282	0.000149	0.000128	0.448079	0.53602
Acinetobacter	8e-06	1.8e-05	4.1e-05	8.5e-05	6e-06	8e-06	0.645129	0.705782
Agathobacter	0.001134	0.000353	0.000365	0.000253	0.000338	0.000124	6.8e-05	0.001083	< 0.001	< 0.001	>= 0.1
Akkermansia	0.01266	0.026202	0.006514	0.008691	0.000768	0.00021	0.029578	0.072807
Alistipes	0.000328	0.000147	0.000307	0.000155	0.000757	0.000264	0.428197	0.521993
Allobaculum	0.000834	0.001367	0.000344	0.000117	0.000321	8.8e-05	0.554269	0.633451
Alloprevotella	0.065532	0.067511	0.014429	0.010657	0.002782	0.002187	0.03421	0.079616
Anaeroplasma	0	0	1.1e-05	1.1e-05	0.00304	0.004305	0.076313	0.152626
Anaerotruncus	0.005966	0.004339	0.005112	0.001294	0.005804	0.003842	0.884824	0.90606
Anaerovorax	0.001479	0.000552	0.000885	0.000493	0.00038	0.000179	0.006927	0.028602	>= 0.1	< 0.02	>= 0.1
Bacteroides	0.121153	0.058487	0.046405	0.042191	0.026566	0.01581	0.004891	0.023187	< 0.05	< 0.01	>= 0.1
Bifidobacterium	0.000552	0.000462	0.00789	0.00544	0.004413	0.002881	0.001928	0.010728	< 0.01	>= 0.1	>= 0.1
Blautia	0.058703	0.047906	0.09848	0.06397	0.005523	0.001562	0.000331	0.00265	>= 0.1	>= 0.1	< 0.1
Brachybacterium	0.000156	0.000144	0.000275	0.000118	5.4e-05	5.8e-05	0.023738	0.0633
Brachymonas	0	0	3e-06	6e-06	3e-06	7e-06	0.568711	0.644204
Brachyspira	0.000151	3e-05	0.00016	9.2e-05	0.000125	6.1e-05	0.009713	0.03552	>= 0.1	>= 0.1	>= 0.1
Brevibacterium	0.000327	0.000382	0.000658	0.000412	0.000136	9.4e-05	0.200744	0.30958
Candidatus_Arthromitus	9e-06	1.3e-05	4.9e-05	7.3e-05	5.7e-05	4.1e-05	0.505983	0.588781
Candidatus_Saccharimonas	9e-05	0.0001	7.3e-05	4.3e-05	0.002156	0.001368	7.1e-05	0.001007	>= 0.1	< 0.001	< 0.001
Candidatus_Soleaferrea	0.000215	0.000258	0.000317	0.000141	0	0	0.050879	0.108543
Candidatus_Stoquefichus	0.000487	0.000869	0.000378	0.00034	6e-06	9e-06	0.336517	0.439533
Christensenellaceae_R-7_group	3e-06	6e-06	4.3e-05	6.1e-05	0.000195	0.000235	0.114313	0.203223
Clostridium_sensu_stricto_1	0.000291	0.00046	0.000719	0.001316	0.000149	0.000135	0.376919	0.477679
Clostridium_sensu_stricto_10	6.5e-05	4.6e-05	5.2e-05	4.9e-05	6.3e-05	2.7e-05	0.942883	0.950308
Comamonas	3e-06	7e-06	8e-06	1.2e-05	0	0	0.505549	0.593672
Coprococcus_3	0.000204	0.000139	3.8e-05	5.2e-05	9e-06	8e-06	0.016152	0.049225	>= 0.1	>= 0.1	>= 0.1
Coriobacteriaceae_UCG-002	0.008152	0.014492	0.011678	0.020559	0.010133	0.016995	0.933821	0.948644
Cutibacterium	7.7e-05	7.3e-05	0.000201	8.3e-05	7.7e-05	6.6e-05	0.012904	0.04235	< 0.1	>= 0.1	< 0.1
Desulfovibrio	0.021277	0.009345	0.021249	0.014105	0.026846	0.025136	0.78128	0.813039
Dialister	0.000513	0.000235	0.000287	0.000121	0.000148	0.000116	0.000941	0.006022	< 0.1	< 0.01	>= 0.1
Dietzia	0.000101	0.000107	0.000129	0.00011	4.1e-05	5.2e-05	0.24456	0.351727
Dorea	0.000102	5.9e-05	0.000117	6.2e-05	4.9e-05	2.7e-05	0.19651	0.306747
Dubosiella	0.000251	8.8e-05	0.002926	0.006083	0.000296	0.00013	0.016336	0.048627	>= 0.1	>= 0.1	>= 0.1
Enterococcus	5.9e-05	5.7e-05	0.00015	0.000102	2.7e-05	2.7e-05	0.159775	0.262194
Enterorhabdus	0.00141	0.000788	0.005463	0.002892	0.001124	0.000671	0.000221	0.002172	< 0.01	>= 0.1	< 0.001
Erysipelatoclostridium	0.021783	0.017514	0.029503	0.024725	0.000686	0.000834	0.101806	0.197442
Escherichia-Shigella	0.001576	0.002306	0.000719	0.000453	0.000237	0.000159	0.156179	0.259622
Faecalibacterium	0.002648	0.000282	0.001683	0.000622	0.001765	0.000156	0.005204	0.023792	< 0.02	< 0.05	>= 0.1
Faecalibaculum	0.015034	0.02657	0.092249	0.06848	0.017051	0.010883	0.013184	0.042188	< 0.05	>= 0.1	< 0.05
Family_XIII_AD3011_group	0.000359	0.000471	0.000285	0.000251	0.008507	0.007072	0.001237	0.007539	>= 0.1	< 0.01	< 0.01
Fusobacterium	0.000196	8.8e-05	0.000316	0.000117	0.000375	4.4e-05	0.000193	0.002243	>= 0.1	< 0.05	>= 0.1
GCA-900066225	7.6e-05	0.000109	0.002414	0.002649	0.000489	0.000415	0.039359	0.088384
GCA-900066575	0.036204	0.016228	0.015478	0.0126	0.001726	0.001512	0.000206	0.0022	< 0.05	< 0.001	>= 0.1
Harryflintia	0.00085	0.000312	0.000262	0.000299	0.000557	0.00068	0.201208	0.306602
Helicobacter	0.0202	0.025145	0.009608	0.00234	0.026989	0.023674	0.171355	0.277639
Ileibacterium	0.006401	0.012092	0.014322	0.026502	0.114262	0.110371	0.008861	0.033358	>= 0.1	< 0.05	< 0.05
Intestinimonas	0.027205	0.006678	0.045081	0.013716	0.01384	0.012615	0.000346	0.002608	< 0.1	>= 0.1	< 0.01
Klebsiella	0.000247	3.5e-05	0.000671	0.000461	0.000227	6.5e-05	0.025733	0.065877
Lachnoclostridium	0.000108	5.1e-05	4.9e-05	3.9e-05	5.5e-05	4.4e-05	3.9e-05	0.001003	>= 0.1	>= 0.1	>= 0.1
Lachnospira	8.5e-05	5.4e-05	0.000101	0.000106	2.4e-05	8e-06	0.110073	0.201277
Lachnospiraceae_FCS020_group	0.000444	0.000184	0.000462	0.000349	0.000763	0.000776	0.587757	0.654199
Lachnospiraceae_NK4A136_group	0.064637	0.063583	0.004354	0.003742	0.027613	0.033115	0.110789	0.199732
Lachnospiraceae_UCG-004	0.000103	4.7e-05	4.1e-05	3.6e-05	3e-05	1.6e-05	0.000415	0.002948	< 0.05	< 0.01	>= 0.1
Lachnospiraceae_UCG-006	0.001753	0.000552	0.002984	0.003084	0.006008	0.006509	0.142763	0.246941
Lactobacillus	0.00328	0.001955	0.015527	0.008796	0.022949	0.015197	0.003099	0.015868	>= 0.1	< 0.01	>= 0.1
Lactococcus	2.2e-05	3.3e-05	4.9e-05	6.6e-05	0.000363	0.000206	7.7e-05	0.000989	>= 0.1	< 0.001	< 0.001
Marvinbryantia	0.000197	9e-05	0.00032	0.000319	0.000106	8.5e-05	0.109145	0.202472
Megamonas	0.000774	0.00016	0.000523	0.000138	0.000704	7.5e-05	4.2e-05	0.000902	>= 0.1	>= 0.1	>= 0.1
Megasphaera	8.8e-05	3.9e-05	0.000148	6e-05	6.6e-05	0.0001	0.106377	0.203227
Mucispirillum	0.002655	0.002304	0.001229	0.000605	0.001363	0.002158	0.319279	0.430187
Mycoplasma	0.000707	0.000593	0	0	0.000509	0.000783	0.045685	0.100823
Negativibacillus	0.000935	0.000319	0.00037	0.000333	0.000251	0.000296	0.010721	0.037087	>= 0.1	>= 0.1	>= 0.1
Ochrobactrum	8.4e-05	9.4e-05	0.000182	0.000111	2.1e-05	2e-05	0.049816	0.108075
Odoribacter	0	0	3e-06	6e-06	0	0	0.42901	0.51805
Oscillibacter	0.017898	0.006497	0.015817	0.014481	0.009808	0.00828	0.548964	0.63304
Oscillospira	9.6e-05	2.3e-05	5.8e-05	3.8e-05	7.8e-05	3.2e-05	0.000289	0.002463	>= 0.1	>= 0.1	>= 0.1
Pantoea	3.4e-05	1.2e-05	0.000298	0.000397	7.5e-05	4.5e-05	0.266082	0.37427
Parabacteroides	0.014933	0.00833	0.021098	0.012837	0.003478	0.001155	0.000263	0.002403	>= 0.1	>= 0.1	< 0.05
Parasutterella	0.001568	0.001508	0.000662	0.000474	0.000356	0.000372	0.017753	0.051644
Peptococcus	0.000126	0.000233	0.001474	0.002393	0.00038	0.000226	0.28796	0.40064
Phascolarctobacterium	0.000237	5.9e-05	0.000175	3.6e-05	0.000205	4.4e-05	0.006999	0.027995	>= 0.1	>= 0.1	>= 0.1
Prevotella_9	0.001359	0.00061	0.000536	0.000484	0.000516	0.000228	0.011009	0.037084	< 0.05	< 0.05	>= 0.1
Prevotellaceae_Ga6A1_group	6.8e-05	2.3e-05	0.000113	5.8e-05	0.000179	5.4e-05	2.4e-05	0.000773	>= 0.1	< 0.01	>= 0.1
Prevotellaceae_UCG-001	0	0	5e-06	1.2e-05	9.4e-05	0.000168	0.26272	0.373647
Proteiniphilum	0	0	8e-06	1.8e-05	6e-06	8e-06	0.651154	0.706337
Proteus	0.000154	0.000162	0.000148	0.000308	0.000187	0.000262	0.229142	0.333298
Rikenella	0.009332	0.005435	0.008328	0.004706	0.028044	0.014646	0.001858	0.01081	>= 0.1	< 0.01	< 0.01
Rikenellaceae_RC9_gut_group	0.001949	0.00176	0.001931	0.001533	0.000518	0.000189	0.313856	0.427378
Romboutsia	0.00054	0.000685	0.03014	0.021152	0.004667	0.005744	0.000476	0.003207	< 0.01	>= 0.1	< 0.01
Roseburia	0.020638	0.008966	0.002353	0.002235	0.000573	0.000276	1e-06	6.8e-05	< 0.001	< 0.001	>= 0.1
Ruminiclostridium	0.027914	0.03915	0.009887	0.018127	0.006434	0.003676	0.145013	0.247489
Ruminiclostridium_5	0.004215	0.001556	0.004669	0.003776	0.003578	0.003765	0.417353	0.513665
Ruminiclostridium_9	0.073923	0.04128	0.074077	0.037164	0.012931	0.010357	0.006253	0.02668	>= 0.1	< 0.02	< 0.02
Ruminococcaceae_UCG-002	0.000108	0.000117	9.2e-05	0.0001	7.5e-05	9e-06	0.57402	0.644514
Ruminococcaceae_UCG-004	9.3e-05	6.3e-05	0.000142	6.6e-05	0.000236	0.000156	0.026098	0.065502
Ruminococcaceae_UCG-005	0.000285	0.000129	0.000122	9.3e-05	0.000133	3.7e-05	0.022467	0.061185
Ruminococcaceae_UCG-009	1.7e-05	1.9e-05	0.000322	0.000277	0.00545	0.003183	4.4e-05	0.000803	>= 0.1	< 0.001	< 0.001
Ruminococcaceae_UCG-010	0.000972	0.000468	0.000682	0.000341	0.001452	0.001433	0.680765	0.72615
Ruminococcaceae_UCG-013	0.000494	0.000223	0.001728	0.001004	0.00085	0.000497	0.002909	0.015513	< 0.02	>= 0.1	>= 0.1
Ruminococcaceae_UCG-014	0.009166	0.008041	0.004727	0.002487	0.012405	0.010997	0.175397	0.280635
Ruminococcus_2	6.3e-05	1.5e-05	4.7e-05	6e-05	8.1e-05	4.5e-05	0.107184	0.201758
Shuttleworthia	1.7e-05	1.2e-05	1.1e-05	1.1e-05	6e-06	1.4e-05	0.065458	0.132995
Sporanaerobacter	6e-06	8e-06	1.6e-05	3.7e-05	9e-06	8e-06	0.792567	0.818133
Streptococcus	0.000788	0.000107	0.002259	0.001797	0.000757	0.000304	0.034971	0.079935
Subdoligranulum	0.000308	8e-05	0.000289	0.000231	0.00026	5.1e-05	0.33743	0.436273
Turicibacter	1.9e-05	1.5e-05	4.9e-05	3.9e-05	0.000208	0.000187	0.410093	0.50963
Tyzzerella	0.004274	0.004255	0.004357	0.005859	0.002427	0.002582	0.181947	0.287521
UBA1819	5.6e-05	7e-05	0.000816	0.00088	3.9e-05	2.8e-05	0.02163	0.060188
Veillonella	3.1e-05	2.6e-05	3.8e-05	4e-05	2.7e-05	1.3e-05	0.702925	0.74359
[Acetivibrio]_ethanolgignens_group	6e-06	1.3e-05	2.2e-05	1.5e-05	0.003187	0.003497	0.013309	0.041549	>= 0.1	< 0.05	< 0.05
[Eubacterium]_brachy_group	5.2e-05	6.2e-05	0.000226	0.000312	6.2e-05	7.3e-05	0.203894	0.30704
[Eubacterium]_coprostanoligenes_group	0.003316	0.002536	0.007134	0.005444	0.000664	0.000415	0.052935	0.111077
[Eubacterium]_eligens_group	0.000208	0.000111	7.2e-05	3.4e-05	7.8e-05	1.1e-05	0.003172	0.015618	< 0.01	< 0.02	>= 0.1
[Eubacterium]_nodatum_group	0.004493	0.003615	0.003419	0.002271	0.005107	0.004518	0.326008	0.434677
[Eubacterium]_ventriosum_group	2.9e-05	3.1e-05	1.9e-05	1.2e-05	2.1e-05	1.7e-05	0.970946	0.970946
[Eubacterium]_xylanophilum_group	0.00066	0.000687	0.00022	0.000221	0.000109	0.000137	0.061934	0.127863
[Ruminococcus]_torques_group	0.000178	0.000336	0.000625	0.001329	0	0	0.146946	0.247488
uncultured_bacterium_f_Christensenellaceae	0.000216	8.1e-05	0.00043	0.000246	0.000362	0.000216	0.033415	0.079206
uncultured_bacterium_f_Clostridiales_vadinBB60_group	4e-05	2.6e-05	0.000855	0.000819	0.005185	0.007878	0.134039	0.235027
uncultured_bacterium_f_Deinococcaceae	9.3e-05	0.00013	5.2e-05	8e-05	0.000117	8.1e-05	0.674845	0.725883
uncultured_bacterium_f_Desulfovibrionaceae	0.004092	0.000874	0.001985	0.001465	0.004074	0.003657	0.212213	0.312222
uncultured_bacterium_f_Enterobacteriaceae	5.2e-05	3.8e-05	5.7e-05	7e-05	2.1e-05	1.8e-05	0.632958	0.698436
uncultured_bacterium_f_Erysipelotrichaceae	0.000636	0.000788	0.003423	0.001657	0.000749	0.001359	0.030853	0.074514
uncultured_bacterium_f_Family_XIII	6e-06	8e-06	1.1e-05	6e-06	2.7e-05	6.1e-05	0.740682	0.777109
uncultured_bacterium_f_Lachnospiraceae	0.169153	0.021348	0.189736	0.070044	0.062861	0.058601	0.006036	0.02664	>= 0.1	< 0.1	< 0.02
uncultured_bacterium_f_Muribaculaceae	0.04673	0.02298	0.062693	0.026388	0.448262	0.080078	0	0	>= 0.1	< 0.001	< 0.001
uncultured_bacterium_f_Peptococcaceae	0.022819	0.013799	0.034439	0.017115	0.001301	0.000673	0.010315	0.036675	>= 0.1	>= 0.1	< 0.1
uncultured_bacterium_f_Prevotellaceae	0.00014	5.3e-05	0.000189	4.6e-05	0.000174	5.9e-05	0.01911	0.054356
uncultured_bacterium_f_Ruminococcaceae	0.032945	0.004088	0.034948	0.016066	0.02553	0.01869	0.373656	0.47828
uncultured_bacterium_o_Bacteroidales	0.00019	4.7e-05	0.000254	3.1e-05	0.000458	0.000157	1.1e-05	0.000482	>= 0.1	< 0.001	< 0.01
uncultured_bacterium_o_Chloroplast	0.0001	0.000138	0.002113	0.004028	0.000104	4.2e-05	0.379517	0.476257
uncultured_bacterium_o_Clostridiales	0.002819	0.001319	0.003131	0.002119	0.001487	0.001716	0.291507	0.401214
uncultured_bacterium_o_DTU014	6e-06	8e-06	3e-06	6e-06	0	0	0.208144	0.309796
uncultured_bacterium_o_Gastranaerophilales	0	0	0	0	3.3e-05	3.5e-05	0.007929	0.030756	>= 0.1	< 0.05	< 0.05
uncultured_bacterium_o_Mollicutes_RF39	0.00165	0.002501	0.000792	0.001558	0.002956	0.002379	0.080779	0.159073
uncultured_bacterium_o_Rhodospirillales	0.000522	0.000435	0.000696	0.000754	4.7e-05	3.9e-05	0.468795	0.555609
[truncated: 5,000 more columns]

## Sheet: FMT 16S
Abundance heatmap Phylum
Taxon	FBG1	FBG3	FBG5	FBG6	FBG7	FW1	FW2	FW3	FW7	FW8	FN2	FN4	FN5	FN7	FN8
Actinobacteria	0.00204034	0.00558773	0.00931562	0.0183551	0.011345	0.00637023	0.00587043	0.00762934	0.00554722	0.0032059	0.00463083	0.00329619	0.00486187	0.00151212	0.00745065
Bacteroidetes	0.132747	0.174081	0.0773554	0.226251	0.203677	0.212196	0.162331	0.137648	0.135521	0.0434744	0.271525	0.267935	0.307656	0.232693	0.309703
Cyanobacteria	3.11502e-05	8.75363e-05	8.24391e-05	0.000320847	0.000150355	8.41881e-05	5.59089e-05	0.00030573	0.000100079	0	0.000887917	4.22589e-05	2.85992e-05	0.00112329	1.39005e-05
Deferribacteres	0.0134413	0.000335556	0.0357373	0.00356942	0.00061509	0.0012067	0.000656929	0.000486388	0.00351705	0.00820949	0.00146165	0.00377513	0.00746439	0.0186063	0.000347512
Deinococcus-Thermus	0	1.45894e-05	0.000261057	0.000280741	0.000328048	0	5.59089e-05	4.16904e-05	0.000228751	4.49425e-05	2.73205e-05	7.04315e-05	0.000185895	0.000144011	0
Epsilonbacteraeota	0.0698544	0.00408503	0.0851733	0.0708002	0.0246583	0.0189423	0.00823258	0.0235968	0.0261062	0.0363285	0.0116659	0.0199321	0.0416976	0.103256	0.0107729
Firmicutes	0.713558	0.736166	0.729407	0.600158	0.71535	0.716034	0.777511	0.788074	0.766331	0.847705	0.649505	0.659746	0.612095	0.57809	0.642897
Fusobacteria	0.00066973	0.00046686	0.000686992	0.000668431	0.000642428	8.41881e-05	0.000195681	2.77936e-05	0.000486096	0.000404482	2.73205e-05	9.8604e-05	5.71984e-05	0.000100808	0.000152905
Patescibacteria	6.23004e-05	0.000277198	5.49594e-05	0.000106949	6.83434e-05	0.000112251	0.000125795	0.000250142	0.00018586	0.000134827	0.00318284	0.00285952	0.000128696	0.000331226	0.000986934
Proteobacteria	0.0665524	0.0775134	0.0606065	0.0349723	0.0371514	0.038951	0.0387029	0.0366459	0.0548717	0.0590994	0.053275	0.0338212	0.0248956	0.0442259	0.0249096
Spirochaetes	0.000202476	0.000291788	0.000219838	0.000213898	0.000191361	0.000449003	0.000447271	0.000569769	0.000142969	0.000194751	6.83013e-05	4.22589e-05	2.85992e-05	0.000288023	0.000472616
Tenericutes	0.000155751	0.000102126	9.61789e-05	0.000187161	0.000492072	0.00506532	0.00494793	0.00379383	0.00112946	0.000329578	0.0029916	0.00209886	0.000285992	0.00133931	0.00152905
Verrucomicrobia	0.000685305	0.000992078	0.00100301	0.0441165	0.00533078	0.000505128	0.000866587	0.000931086	0.00583315	0.000868888	0.000751315	0.00628249	0.000614883	0.0182894	0.000764526
Abundance heatmap Genus
Taxon	FN2	FN4	FN5	FN7	FN8	FW1	FW2	FW3	FW7	FW8	FBG1	FBG3	FBG5	FBG6	FBG7
Acetatifactor	0.0196435	0.0262005	0.000443288	0.0124426	0.0253406	0.000561254	0.00107625	0.000819911	0.0046608	0.00197747	0.016385	0.0200312	0.00469903	0.00112296	0.00587753
Akkermansia	0.000751315	0.00628249	0.000614883	0.0182894	0.000764526	0.000505128	0.000866587	0.000931086	0.00583315	0.000868888	0.000685305	0.000992078	0.00100301	0.0441165	0.00533078
Alloprevotella	0.0255447	0.0181291	0.00553395	0.0480566	0.0187795	0.0089099	0.00775736	0.00450256	0.00969333	0.00104866	0.0067596	0.00971653	0.00603179	0.0284351	0.0315063
Anaerotruncus	0.0031965	0.00370469	0.00544815	0.00587566	0.00391993	0.00537401	0.00561884	0.00657319	0.00481807	0.00573766	0.0065104	0.00692996	0.015581	0.00895698	0.018398
Bacteroides	0.0660201	0.0516263	0.194375	0.018347	0.0637476	0.0749835	0.0461108	0.0290582	0.0348274	0.0125989	0.0234405	0.0142684	0.03042	0.102845	0.0644888
Blautia	0.0752271	0.0492879	0.267374	0.00914472	0.109744	0.0417713	0.0713397	0.0614656	0.0786189	0.0944092	0.0292033	0.0424989	0.0141108	0.0153739	0.0117551
Desulfovibrio	0.0280172	0.0293277	0.0188183	0.0411008	0.0197804	0.0359343	0.0366902	0.0343807	0.0497963	0.0478188	0.0610544	0.0733554	0.0557151	0.0267239	0.0275014
Erysipelatoclostridium	0.000983539	0.000718401	0.00796488	0.00220337	0.0059633	0.00499516	0.00479419	0.00715685	0.00378869	0.00272651	0.000903356	0.0023343	0.00428683	0.0116842	0.00400492
Faecalibaculum	0.00739021	0.00547957	0.00511926	0.00247699	0.0276063	0.0518599	0.03068	0.0255979	0.0194296	0.0200893	0.0030683	0.00532512	0.00931562	0.0176466	0.0119738
GCA-900066575	0.00463083	0.00518376	0.0117972	0.00283702	0.00939672	0.0186477	0.0247537	0.0265568	0.0106083	0.00480884	0.00598084	0.00662358	0.00467155	0.003409	0.00459267
Helicobacter	0.0116659	0.0199321	0.0416976	0.103256	0.0107729	0.0189423	0.00823258	0.0235968	0.0261062	0.0363285	0.0698544	0.00408503	0.0851733	0.0708002	0.0246583
Ileibacterium	0.00786832	0.00828274	0.00100097	0.00273621	0.0306783	0.00106638	0.000936474	0.00108395	0.00613339	0.00805968	0.00258547	0.00417256	0.0102087	0.0220716	0.0152132
Intestinimonas	0.0500922	0.0408502	0.00809358	0.0372845	0.0262441	0.040733	0.0565658	0.0476938	0.0301666	0.0298418	0.0557122	0.067009	0.0113491	0.0208016	0.0141061
Lachnospiraceae_NK4A136_group	0.0128407	0.0227494	0.00490476	0.00813664	0.0114957	0.00298868	0.00348033	0.0030434	0.0423904	0.0579908	0.0701503	0.0801541	0.159314	0.0383011	0.179907
Lactobacillus	0.00639301	0.00256371	0.00175885	0.00103688	0.00462886	0.0199105	0.0170941	0.0138551	0.00783473	0.00311601	0.000872206	0.00166319	0.00206098	0.00236625	0.00195462
Mucispirillum	0.00146165	0.00377513	0.00746439	0.0186063	0.000347512	0.0012067	0.000656929	0.000486388	0.00351705	0.00820949	0.0134413	0.000335556	0.0357373	0.00356942	0.00061509
Oscillibacter	0.0208729	0.0223409	0.00504776	0.0161725	0.0139144	0.0247653	0.0299112	0.0280437	0.0184574	0.0228008	0.0347948	0.0321988	0.0201426	0.0211492	0.0199153
Parabacteroides	0.00991736	0.0156358	0.0850112	0.0209104	0.00917431	0.0106779	0.0112377	0.0065037	0.00783473	0.00365532	0.00710225	0.00630261	0.0100988	0.0282212	0.0368644
Peptococcus	0.00715798	0.00601485	0.000586284	0.00299543	0.00426745	0.00548626	0.00633168	0.00776831	0.00408893	0.00199245	0.00485943	0.00690078	0.000192358	6.68431e-05	0.000328048
Rikenella	0.0167885	0.0374836	0.0101241	0.0025202	0.0113428	0.0172305	0.0152491	0.00857433	0.00739152	0.00465904	0.0137684	0.0133201	0.0021709	0.0113099	0.00565883
Romboutsia	0.0119664	0.00447944	0.00220214	0.00177134	0.0030859	0.0216363	0.0113355	0.0121319	0.00350275	0.000943792	0.000327077	0.00142976	0.00311895	0.0104008	0.0136003
Roseburia	0.0167885	0.00225381	0.00191615	0.000561644	0.0192244	0.000406909	0.000587043	0.000597563	0.00135821	0.00208233	0.00179114	0.00144435	0.0110606	0.00147055	0.00759978
Ruminiclostridium	0.0120757	0.0301306	0.0137276	0.013105	0.025563	0.0456861	0.00743588	0.0194277	0.0318393	0.0651965	0.0480336	0.0148666	0.0313543	0.0347451	0.031889
Ruminiclostridium_9	0.0821255	0.0659379	0.0423411	0.0419937	0.0479705	0.0693429	0.107736	0.115038	0.0740725	0.0740203	0.0837474	0.107888	0.0451491	0.0957461	0.0553308
Ruminococcaceae_UCG-014	0.0103545	0.036892	0.00105817	0.0120249	0.00917431	0.0112251	0.0155287	0.0192193	0.00807778	0.00259168	0.00158866	0.00369111	0.00114041	0.00516029	0.00434664
Tyzzerella	0.00260911	0.00928287	0.00211634	0.00457956	0.00439255	0.00979388	0.0017192	0.00747648	0.00779184	0.0168834	0.00908029	0.00159024	0.0120911	0.0157349	0.00939038
uncultured_bacterium_f_Lachnospiraceae	0.204604	0.239044	0.154665	0.327626	0.197331	0.256591	0.297393	0.287983	0.321152	0.333039	0.202336	0.196855	0.284071	0.148031	0.200027
uncultured_bacterium_f_Muribaculaceae	0.149785	0.141173	0.00943774	0.140051	0.203294	0.0953149	0.0780068	0.0856877	0.073329	0.0199844	0.0788101	0.128503	0.0269026	0.0509612	0.0617414
uncultured_bacterium_f_Peptococcaceae	0.00345605	0.00291586	0.00337471	0.0037875	0.00492077	0.0037604	0.00608009	0.00604511	0.00799199	0.00271153	0.00439218	0.00713421	0.0196892	0.0239432	0.0294833
uncultured_bacterium_f_Ruminococcaceae	0.0280036	0.0314265	0.0368072	0.0450323	0.0278148	0.0388388	0.0357817	0.0366598	0.0394596	0.0585001	0.100631	0.0904396	0.0228219	0.0402396	0.0299071
Anova analysis
genus	FBG(Mean)	FBG(Sd)	FW(Mean)	FW(Sd)	FN(Mean)	FN(Sd)	multiGroup(p)	multiGroup(p-corrected)	FBG::FW(p)	FBG::FN(p)	FW::FN(p)
A2	1.1e-05	1.2e-05	6e-06	1.2e-05	0.000521	0.001134	0.388918	0.592636	-	-	-
ASF356	9e-06	8e-06	3e-06	6e-06	0.000338	0.00074	0.393664	0.585919	-	-	-
Acetatifactor	0.009623	0.008133	0.001819	0.001676	0.016814	0.010676	0.032672	0.181829	-	-	-
Acinetobacter	1.9e-05	1.8e-05	1.4e-05	1.7e-05	9e-06	1.3e-05	0.591366	0.707428	-	-	-
Agathobacter	0.000473	8.3e-05	0.000362	7.5e-05	0.000457	0.000289	0.582647	0.710275	-	-	-
Akkermansia	0.010426	0.018932	0.001801	0.00226	0.005341	0.00763	0.530588	0.679152	-	-	-
Alistipes	0.000748	0.000464	0.000818	0.000543	0.000793	0.000427	0.973108	0.980771	-	-	-
Allobaculum	0.001229	0.00198	0.000249	8.9e-05	0.000219	0.000127	0.319752	0.601887	-	-	-
Alloprevotella	0.01649	0.012431	0.006382	0.003579	0.023209	0.015658	0.11463	0.376221	-	-	-
Anaeroplasma	9e-06	2e-05	1.5e-05	1.8e-05	8e-06	1.3e-05	0.81329	0.874799	-	-	-
Anaerotruncus	0.011275	0.005391	0.005624	0.000638	0.004429	0.001166	0.012187	0.119991	-	-	-
Anaerovorax	0.001273	0.000801	0.002095	0.00068	0.00101	0.000357	0.049498	0.234655	-	-	-
Bacteroides	0.047093	0.036489	0.039516	0.023223	0.078823	0.067343	0.390396	0.587891	-	-	-
Bifidobacterium	0.000894	0.000299	0.000407	0.000197	0.000667	0.000445	0.105849	0.366179	-	-	-
Blautia	0.022588	0.013052	0.069521	0.019624	0.102156	0.099406	0.142788	0.406153	-	-	-
Brachybacterium	0.000199	0.000169	0.000127	8.3e-05	8.3e-05	6.5e-05	0.308376	0.616753	-	-	-
Brachymonas	0	0	3e-06	6e-06	0	0	0.396569	0.583459	-	-	-
Brachyspira	0.000224	4e-05	0.000361	0.000183	0.00018	0.000195	0.202772	0.49913	-	-	-
Brevibacterium	0.000385	0.000366	0.000223	8.8e-05	0.000258	0.000224	0.583184	0.704223	-	-	-
Candidatus_Arthromitus	4.1e-05	3.5e-05	6.2e-05	7.3e-05	5e-05	5.8e-05	0.84643	0.895397	-	-	-
Candidatus_Saccharimonas	0.000114	9.3e-05	0.000162	5.7e-05	0.001498	0.001431	0.034923	0.186258	-	-	-
Candidatus_Soleaferrea	0.00019	0.000111	4.2e-05	2.7e-05	9e-06	1.9e-05	0.002486	0.053043	-	-	-
Candidatus_Stoquefichus	0.000241	0.000494	1.7e-05	2.3e-05	8e-06	8e-06	0.373551	0.590303	-	-	-
Christensenellaceae_R-7_group	3e-06	6e-06	9e-06	1.3e-05	6.3e-05	0.000118	0.342	0.591568	-	-	-
Clostridium_sensu_stricto_1	0.00033	0.000271	0.000786	0.000978	0.000734	0.00153	0.76231	0.84117	-	-	-
Clostridium_sensu_stricto_10	7.6e-05	5.8e-05	5.6e-05	4.9e-05	6.4e-05	7.2e-05	0.878803	0.914527	-	-	-
Comamonas	3e-06	6e-06	0	0	6e-06	8e-06	0.32339	0.591341	-	-	-
Coprococcus_3	0.000168	0.000206	0.000126	6.3e-05	0.000216	0.000177	0.68845	0.779837	-	-	-
Coriobacteriaceae_UCG-002	0.006583	0.005257	0.002982	0.000665	0.001266	0.001294	0.055563	0.237069	-	-	-
Cutibacterium	0.000115	8e-05	0.000106	9.6e-05	4.7e-05	6.6e-05	0.385004	0.593741	-	-	-
Desulfovibrio	0.04887	0.020868	0.040924	0.007278	0.027409	0.008993	0.082062	0.318303	-	-	-
Dialister	0.000319	8.6e-05	0.000187	9.6e-05	0.000129	3.5e-05	0.006403	0.09106	-	-	-
Dietzia	7.5e-05	4.9e-05	9.3e-05	9.4e-05	6.1e-05	5.7e-05	0.775347	0.848243	-	-	-
Dorea	0.005612	0.003142	0.001031	0.000667	0.000126	5.4e-05	0.001136	0.048449	< 0.01	< 0.01	>= 0.1
Dubosiella	0.000356	0.000204	0.000376	0.000188	0.000253	9.1e-05	0.485337	0.647116	-	-	-
Enterococcus	0.000402	0.000625	6.8e-05	8.1e-05	8.6e-05	8.4e-05	0.306974	0.623694	-	-	-
Enterorhabdus	0.001077	0.000596	0.001787	0.000969	0.001968	0.00127	0.350781	0.57564	-	-	-
Erysipelatoclostridium	0.004643	0.004166	0.004692	0.001647	0.003567	0.00323	0.82226	0.877077	-	-	-
Escherichia-Shigella	0.000801	0.000861	0.000185	0.000104	0.001114	0.00121	0.260006	0.5943	-	-	-
Faecalibacterium	0.004163	0.000422	0.002814	0.000911	0.004361	0.004537	0.623124	0.72509	-	-	-
Faecalibaculum	0.009466	0.00573	0.029531	0.013291	0.009614	0.010209	0.01302	0.111107	-	-	-
Family_XIII_AD3011_group	0.000111	5.3e-05	8.3e-05	3.3e-05	7e-05	7.3e-05	0.500742	0.65403	-	-	-
Fusobacterium	0.000627	9.1e-05	0.00024	0.000199	8.7e-05	4.8e-05	7.7e-05	0.009851	< 0.01	< 0.001	>= 0.1
GCA-900066225	0.000732	0.000982	0.003388	0.000878	0.000609	0.000275	0.000137	0.00876	< 0.001	>= 0.1	< 0.001
GCA-900066575	0.005056	0.001264	0.017075	0.009268	0.006769	0.003699	0.013697	0.109578	-	-	-
Harryflintia	0.000547	0.000362	0.000858	0.000206	0.000851	0.000136	0.127119	0.387409	-	-	-
Helicobacter	0.050914	0.034678	0.022641	0.010266	0.037465	0.038832	0.375059	0.585459	-	-	-
Ileibacterium	0.01085	0.008035	0.003456	0.003393	0.010113	0.011924	0.352113	0.570513	-	-	-
Intestinimonas	0.033796	0.025709	0.041	0.0115	0.032513	0.016101	0.747413	0.8392	-	-	-
Klebsiella	0.000204	0.000138	0.000108	4.5e-05	0.00376	0.007693	0.364888	0.583821	-	-	-
Lachnoclostridium	0.000292	8.7e-05	0.000179	0.000132	0.00025	0.000241	0.567427	0.705152	-	-	-
Lachnospira	0.00018	8.3e-05	0.000139	4.3e-05	0.002502	0.005421	0.419908	0.584219	-	-	-
Lachnospiraceae_FCS020_group	0.000703	7.5e-05	0.000575	0.000155	0.000375	0.000154	0.007106	0.090958	-	-	-
Lachnospiraceae_NK4A136_group	0.105565	0.06091	0.021979	0.026338	0.012025	0.006741	0.004267	0.068274	-	-	-
Lachnospiraceae_UCG-004	0.000142	3.3e-05	7.4e-05	4.8e-05	0.00025	0.000428	0.54695	0.693164	-	-	-
Lachnospiraceae_UCG-006	0.000558	0.000523	0.001694	0.000597	0.00111	0.000721	0.041291	0.20328	-	-	-
Lactobacillus	0.001783	0.000568	0.012362	0.006848	0.003276	0.0022	0.003437	0.062848	-	-	-
Lactococcus	6e-06	8e-06	8e-06	1.9e-05	3e-06	6e-06	0.783521	0.849921	-	-	-
Marvinbryantia	2.5e-05	2.2e-05	3.1e-05	2.7e-05	5.4e-05	5.9e-05	0.50482	0.652696	-	-	-
Megamonas	0.001481	0.00019	0.00116	0.000459	0.00097	0.000224	0.068696	0.283648	-	-	-
Megasphaera	0.000511	0.000102	0.000295	0.000232	0.000331	0.00021	0.197562	0.495841	-	-	-
Mucispirillum	0.01074	0.014953	0.002815	0.00325	0.006331	0.007383	0.463962	0.631778	-	-	-
Mycoplasma	4.2e-05	5.6e-05	0.002157	0.001741	5e-05	5.7e-05	0.008305	0.096637	-	-	-
Negativibacillus	0.002028	0.001187	0.000694	0.000114	0.000508	0.000269	0.010094	0.107666	-	-	-
Ochrobactrum	0.000107	0.000105	8.2e-05	4.1e-05	5.5e-05	6.9e-05	0.582316	0.716697	-	-	-
Odoribacter	0	0	3e-06	6e-06	0	0	0.396569	0.576828	-	-	-
Oscillibacter	0.02564	0.007246	0.024796	0.004496	0.01567	0.006851	0.051643	0.236083	-	-	-
Oscillospira	0.000115	4.5e-05	0.000218	8e-05	0.000228	0.000129	0.141656	0.412089	-	-	-
Pantoea	0.000112	0.000102	2.8e-05	1.7e-05	5.5e-05	5e-05	0.171139	0.456371	-	-	-
Parabacteroides	0.017718	0.013946	0.007982	0.003114	0.02813	0.032151	0.326587	0.580599	-	-	-
Parasutterella	0.000634	0.000641	0.000121	6.1e-05	0.000622	0.000781	0.320611	0.594757	-	-	-
Peptococcus	0.002469	0.003197	0.005134	0.002206	0.004204	0.002577	0.318035	0.60759	-	-	-
Phascolarctobacterium	5.6e-05	3.3e-05	3.7e-05	2.8e-05	1.1e-05	1.2e-05	0.05473	0.241566	-	-	-
Prevotella_9	0.000637	0.000331	0.000796	0.00026	0.000841	0.000111	0.430778	0.592898	-	-	-
Prevotellaceae_Ga6A1_group	0.000126	5e-05	9.4e-05	3.7e-05	4.5e-05	4.3e-05	0.03803	0.194714	-	-	-
Prevotellaceae_UCG-001	5e-06	8e-06	3e-06	6e-06	0	0	0.346355	0.591113	-	-	-
Proteiniphilum	3e-06	6e-06	3e-06	6e-06	5e-06	1.2e-05	0.852695	0.894631	-	-	-
Proteus	0.000426	0.000559	0.000209	0.000128	0.000225	0.000202	0.566438	0.710825	-	-	-
Rikenella	0.009246	0.005105	0.010621	0.005368	0.015652	0.013224	0.496539	0.655227	-	-	-
Rikenellaceae_RC9_gut_group	0.000988	0.000438	0.001293	0.000796	0.001541	0.000635	0.418259	0.588321	-	-	-
Romboutsia	0.005775	0.005879	0.00991	0.008154	0.004701	0.004191	0.411658	0.585469	-	-	-
Roseburia	0.004673	0.004426	0.001006	0.000704	0.008149	0.009062	0.196022	0.501815	-	-	-
Ruminiclostridium	0.032178	0.011816	0.033917	0.022541	0.01892	0.008328	0.28243	0.623294	-	-	-
Ruminiclostridium_5	0.001974	0.001005	0.006389	0.002461	0.002509	0.000544	0.001451	0.046424	< 0.01	>= 0.1	< 0.01
Ruminiclostridium_9	0.077572	0.026615	0.088042	0.021553	0.056074	0.017525	0.108177	0.364385	-	-	-
Ruminococcaceae_UCG-002	0.000255	9.2e-05	0.000272	6.3e-05	0.000259	8.2e-05	0.940601	0.955531	-	-	-
Ruminococcaceae_UCG-004	0.000125	9e-05	0.000211	0.000133	0.000263	0.000178	0.314673	0.610274	-	-	-
Ruminococcaceae_UCG-005	0.000351	0.000146	0.000395	0.000125	0.000228	5.1e-05	0.098108	0.348828	-	-	-
Ruminococcaceae_UCG-009	0.000183	0.000362	0.001394	0.000938	0.001137	0.00104	0.092649	0.338829	-	-	-
Ruminococcaceae_UCG-010	0.001014	0.00049	0.000826	0.000528	0.001051	0.001397	0.915819	0.937798	-	-	-
Ruminococcaceae_UCG-013	0.000411	0.000211	0.000909	0.00056	0.000613	0.000373	0.193432	0.505293	-	-	-
Ruminococcaceae_UCG-014	0.003185	0.001749	0.011329	0.006458	0.013901	0.013527	0.17007	0.463169	-	-	-
Ruminococcus_2	0.000218	6.2e-05	0.000143	6.8e-05	0.000174	8.8e-05	0.305633	0.630984	-	-	-
Shuttleworthia	0.000164	7.7e-05	0.000138	7.3e-05	7.3e-05	4.4e-05	0.126119	0.393736	-	-	-
Sporanaerobacter	3e-06	6e-06	0	0	3e-06	6e-06	0.618558	0.72638	-	-	-
Streptococcus	0.000419	0.000213	0.000674	0.000185	0.00095	0.000586	0.123949	0.396638	-	-	-
Subdoligranulum	0.001094	0.000199	0.000916	0.00012	0.000776	9.6e-05	0.015512	0.116797	-	-	-
Turicibacter	2.5e-05	2.8e-05	2.9e-05	2e-05	5.4e-05	4.5e-05	0.348767	0.579768	-	-	-
Tyzzerella	0.009577	0.005204	0.008733	0.005459	0.004596	0.002833	0.234177	0.555087	-	-	-
UBA1819	0.00027	0.000241	0.000132	7.4e-05	4.2e-05	3.3e-05	0.083389	0.313934	-	-	-
Veillonella	2e-05	1.3e-05	8e-06	1.3e-05	0.000795	0.001747	0.396591	0.570378	-	-	-
[Acetivibrio]_ethanolgignens_group	5e-06	7e-06	3e-06	6e-06	0.000119	0.000198	0.227364	0.549107	-	-	-
[Eubacterium]_brachy_group	0.000191	0.000138	0.00033	0.000376	6.4e-05	6.2e-05	0.237588	0.552932	-	-	-
[Eubacterium]_coprostanoligenes_group	0.001181	0.000359	0.004173	0.003253	0.003456	0.004567	0.346392	0.583397	-	-	-
[Eubacterium]_eligens_group	0.000193	3.2e-05	0.000156	4.6e-05	0.000116	3.7e-05	0.027721	0.177414	-	-	-
[Eubacterium]_nodatum_group	0.003827	0.003902	0.001658	0.001061	0.001645	0.001002	0.29286	0.624769	-	-	-
[Eubacterium]_ventriosum_group	3e-05	2.2e-05	4.2e-05	2.2e-05	1.7e-05	1.2e-05	0.144073	0.400899	-	-	-
[Eubacterium]_xylanophilum_group	0.000216	0.000114	0.0003	0.00022	0.000259	0.000187	0.761669	0.847771	-	-	-
[Ruminococcus]_torques_group	0.001047	0.001299	1.8e-05	2.5e-05	2.5e-05	2.3e-05	0.081365	0.325461	-	-	-
uncultured_bacterium_f_Christensenellaceae	0.00046	0.000158	0.000423	0.000207	0.000336	0.000102	0.481964	0.649383	-	-	-
uncultured_bacterium_f_Clostridiales_vadinBB60_group	0.001278	0.000779	0.000288	0.000187	0.003134	0.004782	0.300349	0.63024	-	-	-
uncultured_bacterium_f_Deinococcaceae	0.000177	0.000157	7.4e-05	8.9e-05	8.6e-05	7.8e-05	0.326424	0.588482	-	-	-
uncultured_bacterium_f_Desulfovibrionaceae	0.003123	0.000623	0.003723	0.004105	0.002309	0.001131	0.673716	0.769961	-	-	-
uncultured_bacterium_f_Enterobacteriaceae	3.6e-05	3.7e-05	3.2e-05	1.9e-05	3.7e-05	5.2e-05	0.97321	0.97321	-	-	-
uncultured_bacterium_f_Erysipelotrichaceae	0.001886	0.000692	0.001199	0.001171	0.000924	0.001013	0.31363	0.61761	-	-	-
uncultured_bacterium_f_Family_XIII	1.4e-05	1e-05	1.1e-05	1.5e-05	1.1e-05	1.2e-05	0.914159	0.943648	-	-	-
uncultured_bacterium_f_Lachnospiraceae	0.206264	0.048959	0.299232	0.029881	0.224654	0.064918	0.028677	0.174795	-	-	-
uncultured_bacterium_f_Muribaculaceae	0.069384	0.038034	0.070465	0.029422	0.128748	0.071618	0.140094	0.417025	-	-	-
uncultured_bacterium_f_Peptococcaceae	0.016928	0.010811	0.005318	0.00209	0.003691	0.000755	0.012731	0.1164	-	-	-
uncultured_bacterium_f_Prevotellaceae	0.00012	7.8e-05	4.5e-05	1.1e-05	3.1e-05	2.7e-05	0.027577	0.18578	-	-	-
uncultured_bacterium_f_Ruminococcaceae	0.056808	0.036072	0.041848	0.009431	0.033817	0.00725	0.280577	0.630068	-	-	-
uncultured_bacterium_o_Bacteroidales	0.000265	6.8e-05	0.000214	4.1e-05	8.5e-05	7.2e-05	0.001799	0.046053	>= 0.1	< 0.01	< 0.02
uncultured_bacterium_o_Chloroplast	0.000129	0.000109	0.000109	0.000116	0.000416	0.000544	0.288989	0.626959	-	-	-
uncultured_bacterium_o_Clostridiales	0.003977	0.002427	0.004044	0.001285	0.003009	0.002078	0.66362	0.765256	-	-	-
uncultured_bacterium_o_DTU014	0	0	3e-06	6e-06	3e-06	6e-06	0.61855	0.733096	-	-	-
uncultured_bacterium_o_Gastranaerophilales	6e-06	8e-06	0	0	3e-06	6e-06	0.337585	0.59193	-	-	-
uncultured_bacterium_o_Mollicutes_RF39	0.000156	0.000123	0.000882	0.000677	0.001591	0.000975	0.021034	0.149575	-	-	-
uncultured_bacterium_o_Rhodospirillales	0.001025	0.000614	0.000224	0.000171	0.000625	0.000322	0.030809	0.179251	-	-	-
