# Supplementary material for: Highland barley β-glucan supplementation attenuated hepatic lipid accumulation in Western diet-induced non-alcoholic fatty liver disease mice by modulating gut microbiota
Source: Royal Society of Chemistry journal article supplement (doi:10.1039/d3fo03386d), 2023-12-20
Supplement: d3fo03386d2.pdf [file d3fo03386d2.pdf]

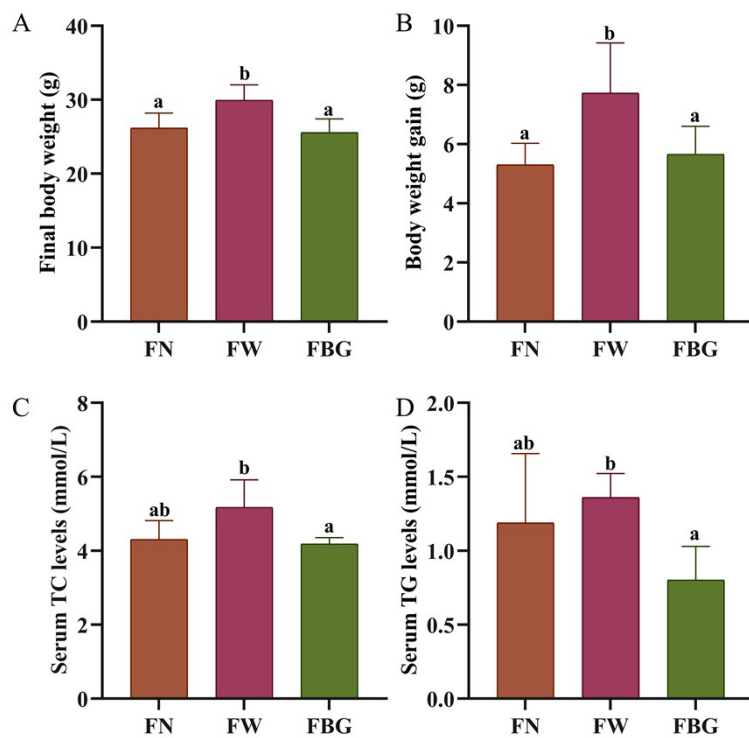

Supplementary Figure S1. The changes of body weight and the levels of serum lipid in mice of FN, FW and FBG group. (A) The final body weight; (B) The body weight gain; (C)The level of serum TC; (D) The level of serum TG

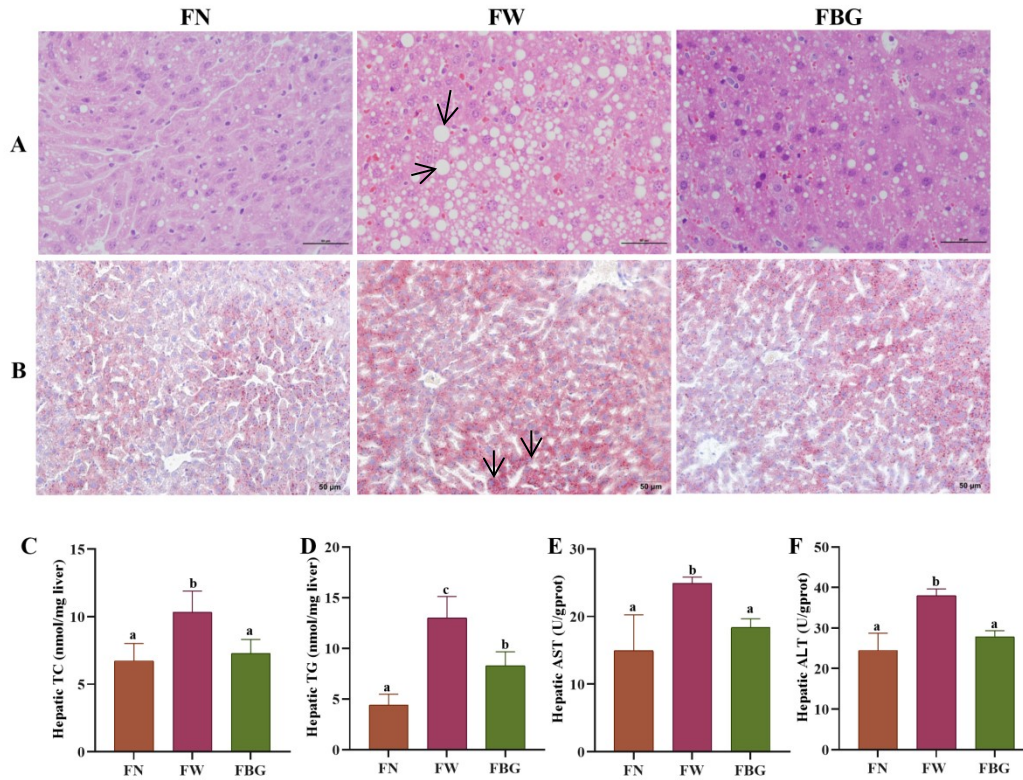

Supplementary Figure S2 Lipid accumulation in the liver of mice transplanted with fecal microbiota

(A) H&E staining of the liver (scale bar, 50  $\mu$ m); (B) The images of the Oil O red-stained in the liver (scale bar, 20  $\mu$ m); (C) The content of hepatic TC; (D) The content of hepatic TG; (E) The levels of ALT in the liver; (F) The levels of AST in the liver. Dark arrows denote white lipid droplets in image of H&E staining of the liver and dark arrows denote red lipid droplets in image of Oil O red-stained

Supplementary Table 1 Primer sequences used for semi-quantitative RT-PCR analysis

| <b>Gene</b>    | <b>Forward primer (5'→3')</b> | <b>Reverse primer (5'→3')</b> |
|----------------|-------------------------------|-------------------------------|
| <i>Ffar2</i>   | ACAGTGGAGGGGACCAAGAT          | GGGGACTCTCTACTCGGTGA          |
| <i>Ffar3</i>   | TTGCTAAACCTGACCATTTCGG        | GATAGGCCACGCTCAGAAAAC         |
| <i>β-actin</i> | GGACTGTTACTGAGCTGCGTT         | CGCCTTCACCGTCCAGTT            |

Supplementation Table 2 Primary antibodies used in Western blotting.

| <b>Primary antibodies</b> | <b>Brand and item number</b>      | <b>Dilution</b> |
|---------------------------|-----------------------------------|-----------------|
| FAS                       | Abways (AB3121)                   | 1:1000          |
| ACC                       | Abways (CY5575)                   | 1:1000          |
| HSL                       | WanleiBio                         | 1:1000          |
| SREBP-1c                  | WanleiBio                         | 1:1000          |
| AMPK                      | Cell Signaling Technology (D63G4) | 1:1000          |
| pAMPK                     | WanleiBio (WL05103)               | 1:1000          |
| PPAR $\alpha$             | WanleiBio (WL00978)               | 1:1000          |
| GAPDH                     | Abways (AB0036)                   | 1:5000          |
