# Supplementary material for: Highland barley β-glucan supplementation attenuated hepatic lipid accumulation in Western diet-induced non-alcoholic fatty liver disease mice by modulating gut microbiota
Source: Royal Society of Chemistry journal article supplement (doi:10.1039/d3fo03386d), 2023-12-20
Supplement: d3fo03386d3.pdf [file d3fo03386d3.pdf]

1. The raw picture of Western blots in Figure 6C.

GAPDH

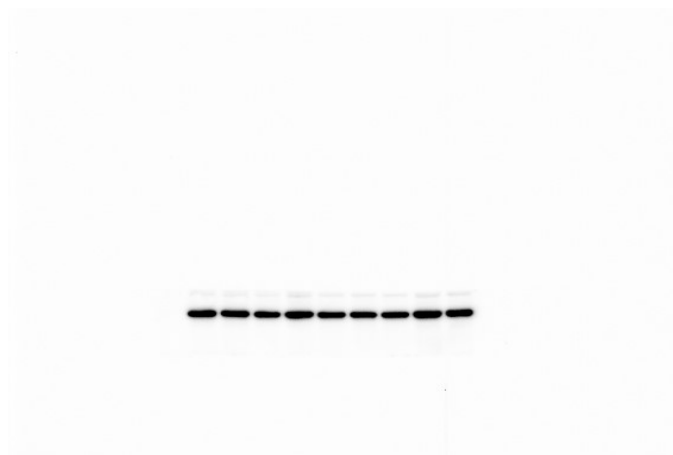

PPAR $\alpha$

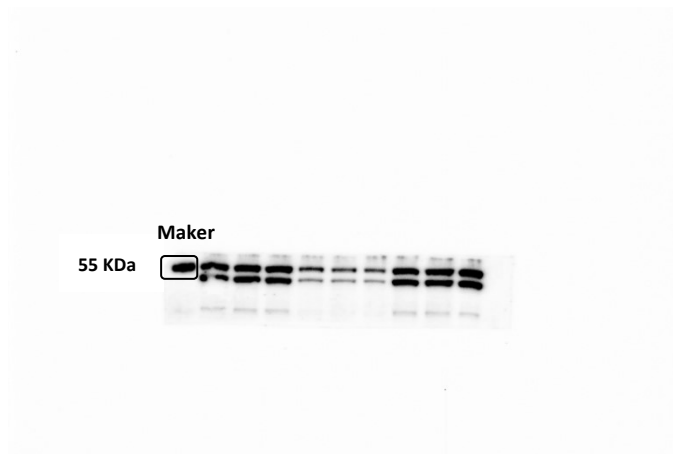

pAMPK(63 kDa)

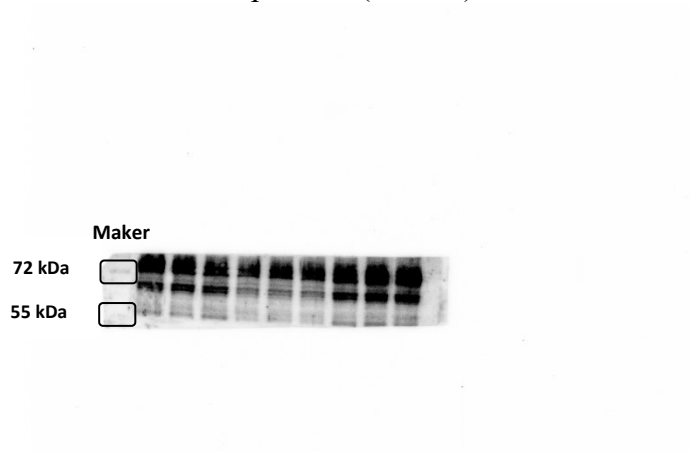

AMPK (63 kDa)

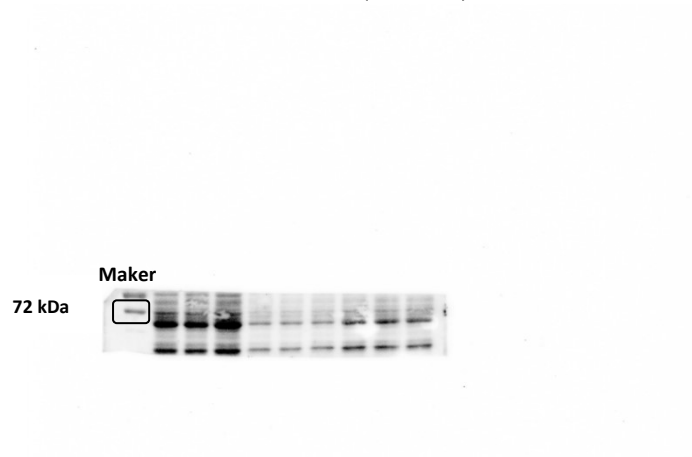

SREBP-1c (65 kDa)

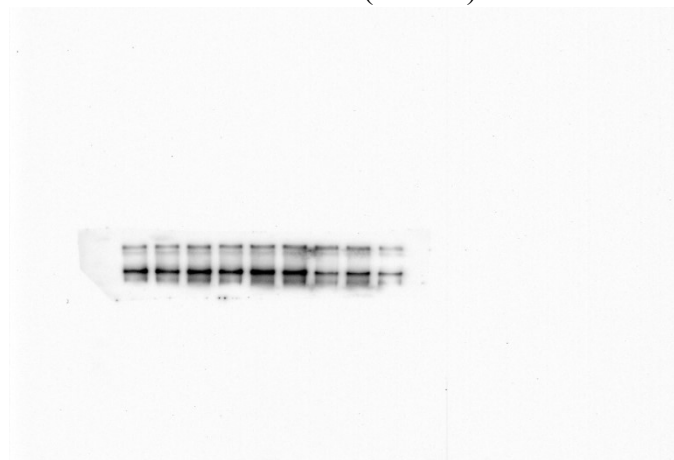

HSL (92 kDa)

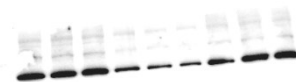

ACC (265 kDa)

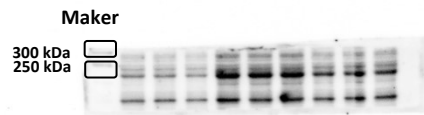

FAS (273 kDa)

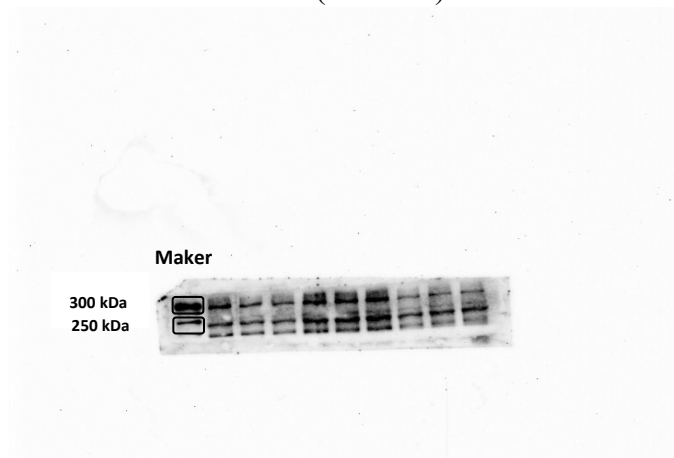

2. The raw picture of Western blots in Figure 9D.

GAPDH

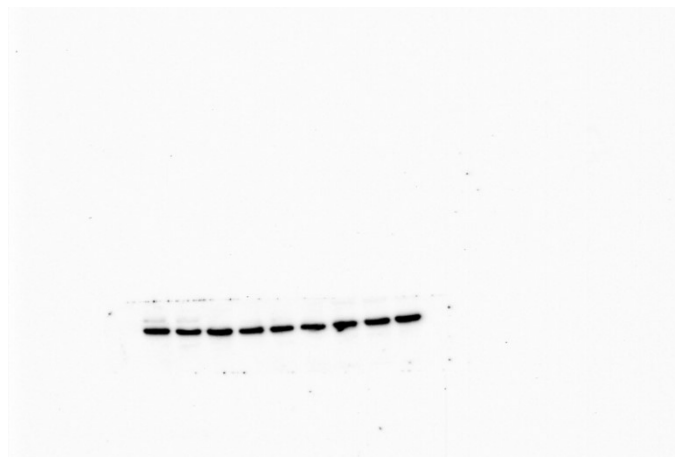

HSL(92 kDa)

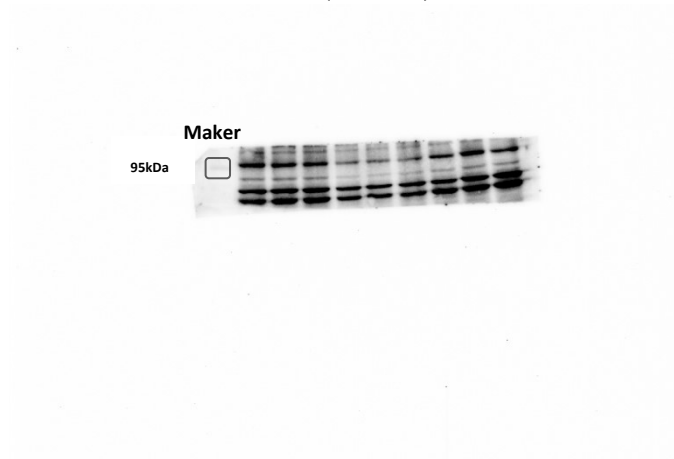

pAMPK (63 kDa)

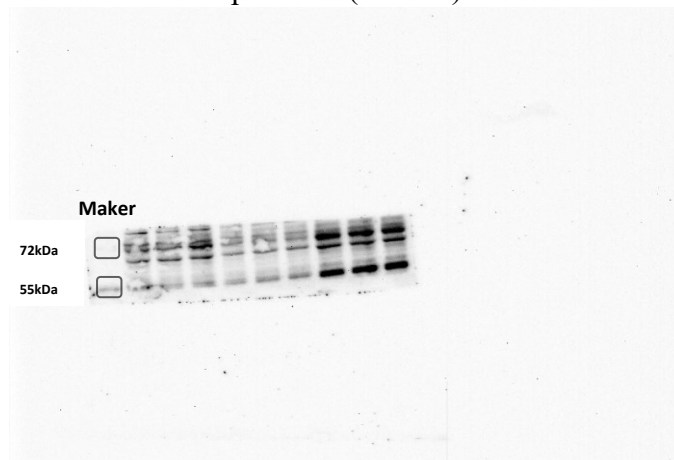

PPAR $\alpha$  (55 kDa)

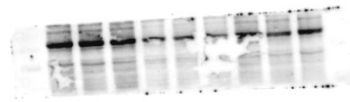

ACC

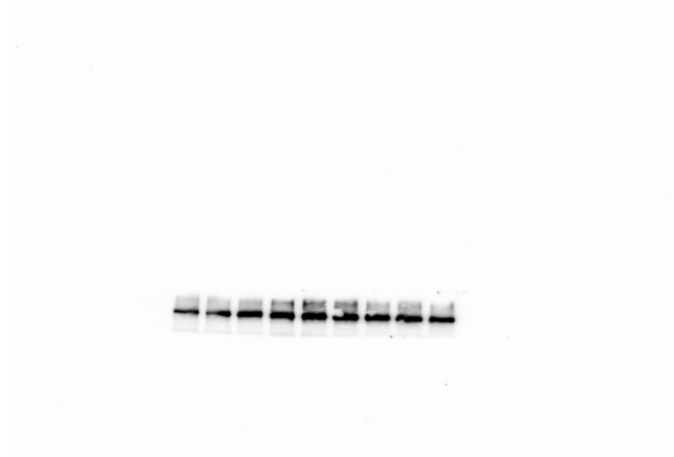

FAS

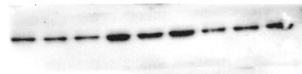

Some of the raw picture of Western blots we provided contained multiple bands, which may be caused by poor specificity of primary antibody. Therefore, the corresponding bands of the measured proteins were selected according to the Marker and the molecular weight of the measured proteins.
